# Supplementary material
Source: PubMed Central journal article supplement (PMC8583323)
Supplement: NIHMS1751949-supplement-supplement.pdf [file NIHMS1751949-supplement-supplement.pdf]

Supplement to:

Genome-wide association study of serum metabolites in the African American Study of Kidney Disease and Hypertension

Shengyuan Luo, MBBS, MHS (1,2)\*, Elena V. Feofanova, MS (3)\*, Adrienne Tin, MS, PhD (1,2), Sarah Tung (4), Eugene P. Rhee, MD (5), Josef Coresh, MD, PhD (1), Dan E. Arking, PhD (6), Aditya Surapaneni, PhD (1,2), Pascal Schlosser, PhD (7), Yong Li, MD (7), Anna Köttgen, MD, MPH (1, 7), Bing Yu, PhD (3), Morgan E. Grams, MD, PhD (1,2,8)

- 1) Department of Epidemiology, Johns Hopkins University Bloomberg School of Public Health, Baltimore MD, USA
- 2) Welch Center for Prevention, Epidemiology, and Clinical Research, Johns Hopkins University, Baltimore MD, USA
- 3) Human Genetics Center, The University of Texas Health Science Center at Houston, Houston, TX, USA
- 4) Johns Hopkins Whiting School of Engineering, Baltimore MD, USA
- 5) Division of Nephrology, Massachusetts General Hospital and Harvard Medical School, Boston, MA, USA
- 6) McKusick-Nathans Institute, Department of Genetic Medicine, Johns Hopkins University School of Medicine, Baltimore, MD, USA
- 7) Institute of Genetic Epidemiology, Faculty of Medicine and Medical Center – University of Freiburg, Freiburg, Germany
- 8) Division of Nephrology, Department of Medicine, Johns Hopkins University, Baltimore MD, USA

Running head: GWAS of serum metabolites in AASK

\* These authors are co-first authors.

Corresponding author:

Shengyuan Luo, MBBS, MHS  
shengyuan.luo@jhu.edu  
2024 E. Monument, Suite 2-500  
Baltimore, MD 21205

**Table S1.** Statistically significant associations (N=42) between index SNPs representing 23 genomic loci and 38 serum metabolites in AASK.

| Distinct index SNP-metabolite association | Distinct Loci | Chromosomal location  | Mapped genes                 | Index SNP  | Coded/Reference Allele | Coded Allele Frequency | Associated metabolite      | Beta coefficient (p value) | Beta coefficient (p value) in the ARIC Study* |
|-------------------------------------------|---------------|-----------------------|------------------------------|------------|------------------------|------------------------|----------------------------|----------------------------|-----------------------------------------------|
| 1                                         | 1             | 1:45907026-47417369   | CYP4A11, FAAH                | rs4507958  | T/A                    | 0.373                  | 10-undecenoate (11:1n1)    | 0.42 (3.78E-14)            | NA                                            |
| 2                                         |               |                       |                              | rs324418   | G/A                    | 0.361                  | N-palmitoylglycine         | 0.42 (6.26E-12)            | NA                                            |
| 3                                         | 2             | 1:53444415-54444415   | HSPB11, LRRC42, DIO1, TMEM59 | rs79319225 | A/G                    | 0.029                  | 3-methyladipate            | 0.75 (1.29E-10)            | -0.12 (0.43)                                  |
| 4                                         | 3             | 1:118887090-119887090 | HAO2                         | rs7528838  | T/A                    | 0.252                  | alpha-hydroxyisovalerate   | -0.57 (4.18E-19)           | NA                                            |
| 5                                         |               |                       |                              | rs7528838  | T/A                    | 0.252                  | 2-hydroxy-3-methylvalerate | -0.47 (1.03E-14)           | -0.27 (5.97E-07)                              |
| 6                                         | 4             | 2:73105659-74173773   | ALMS1, ALMS1P, NAT8, TPRKB   | rs7587577  | T/C                    | 0.547                  | N-acetylasparagine         | 0.72 (1.47E-41)            | NA                                            |
| 7                                         |               |                       |                              | rs7587577  | T/C                    | 0.547                  | N-acetyl-3-methylhistidine | 0.39 (6.11E-13)            | NA                                            |
| 8                                         |               |                       |                              | rs11126412 | T/A                    | 0.392                  | N-acetyl-1-methylhistidine | 0.52 (5.40E-23)            | NA                                            |
| 9                                         |               |                       |                              | rs11126412 | T/A                    | 0.392                  | N-acetylphenylalanine      | 0.36 (2.42E-11)            | NA                                            |
| 10                                        |               |                       |                              | rs13431529 | C/G                    | 0.535                  | N2-acetyllysine            | 0.61 (3.26E-31)            | 0.62 (1.18E-45)                               |
| 11                                        |               |                       |                              | rs13409366 | G/A                    | 0.547                  | N-acetylcitrulline         | 0.68 (7.26E-37)            | NA                                            |
| 12                                        |               |                       |                              | rs13409366 | G/A                    | 0.547                  | N-acetylglutamine          | 0.62 (6.84E-29)            | NA                                            |
| 13                                        |               |                       |                              | rs13409366 | G/A                    | 0.547                  | N-acetylkynurenine         | 0.33 (7.26E-37)            | NA                                            |
| 14                                        |               |                       |                              | rs6546854  | G/A                    | 0.547                  | N-acetylleucine            | 0.53 (1.44E-21)            | 0.57 (1.39E-34)                               |

|    |    |                       |                                                                                       |  |             |      |       |                                        |                  |                 |
|----|----|-----------------------|---------------------------------------------------------------------------------------|--|-------------|------|-------|----------------------------------------|------------------|-----------------|
| 15 |    |                       |                                                                                       |  | rs10168931  | A/G  | 0.54  | N-acetylmethionine                     | 0.66 (1.13E-32)  | 0.68 (2.85E-49) |
| 16 |    |                       |                                                                                       |  | rs10206899  | C/T  | 0.545 | N-delta-acetylmethionine               | -0.69 (7.24E-39) | NA              |
| 17 | 5  | 2:129396140-130396140 | UGT1A3, UGT1A4, UGT1A10                                                               |  | rs951389793 | T/TA | 0.014 | cysteinylglycine                       | 1.12 (1.42E-10)  | 0.01 (0.97)     |
| 18 | 6  | 2:233257337-234264663 | AC114812.9, RPL17P11, UGT1A3, UGT1A4, UGT1A5, UGT1A6, UGT1A7, UGT1A8, UGT1A9, UGT1A10 |  | rs1976391   | G/A  | 0.453 | biliverdin                             | 0.42 (3.69E-17)  | NA              |
| 19 |    |                       |                                                                                       |  | rs4148325   | T/C  | 0.454 | bilirubin (E,E)                        | 0.36 (3.82E-12)  | NA              |
| 20 | 7  | 2:236306573-237306573 | AC011286.1, AC112715.2                                                                |  | rs62184450  | C/A  | 0.029 | cysteinylglycine                       | 0.77 (1.80E-10)  | -0.20 (0.18)    |
| 21 | 8  | 3:51489004-52620872   | POC1A, ACY1, ABHD14A-ACY1                                                             |  | rs73835707  | C/T  | 0.021 | N-acetylmethionine                     | 1.38 (5.33E-13)  | 1.31 (7.12E-15) |
| 22 |    |                       |                                                                                       |  | rs73835707  | C/T  | 0.021 | N-acetylmethionine sulfoxide           | 1.24 (6.06E-13)  | NA              |
| 23 |    |                       |                                                                                       |  | rs2229152   | T/C  | 0.022 | N-acetylmethionine                     | 1.26 (2.21E-12)  | NA              |
| 24 | 9  | 4:185748013-186748013 | KLKB1, CYP4V2, F11, CSMD1, PTHLH                                                      |  | rs1973612   | T/C  | 0.587 | histidylalanine                        | 0.36 (5.08E-11)  | 0.04 (0.16)     |
| 25 | 10 | 5:34536259-35536259   | AGXT2                                                                                 |  | rs344514    | C/T  | 0.822 | 3-aminoisobutyrate                     | 0.96 (1.33E-46)  | NA              |
| 26 | 11 | 6:125264108-126264108 | HEY2, NCOA7                                                                           |  | rs60132035  | A/G  | 0.016 | sphingomyelin (d18:1/20:1, d18:2/20:0) | 1.35 (1.14E-10)  | -0.23 (0.27)    |

|    |    |                        |                                                     |             |       |       |                                    |                  |                  |
|----|----|------------------------|-----------------------------------------------------|-------------|-------|-------|------------------------------------|------------------|------------------|
| 27 | 12 | 7:100192604-101692604  | MOGAT3, AP1S1                                       | rs7780766   | T/C   | 0.297 | N-acetylhistidine                  | -0.50 (6.32E-15) | NA               |
| 28 | 13 | 7:141183499-142183499  | K/AA1147                                            | rs139981949 | T/C   | 0.018 | glycochocholate                    | 1.21 (9.15E-12)  | -0.17 (0.38)     |
| 29 | 14 | 8:90241098-91241098    | TMEM64                                              | rs76541360  | T/A   | 0.072 | 1-arachidonoyl-GPI                 | 0.73 (2.93E-12)  | 0.16 (0.10)      |
| 30 | 15 | 8:143564265-144564265  | OPLAH, CTD-3065J16.9, EXOSC4, GPAA1, KIAA1875, MAF1 | rs59095288  | C/T   | 0.309 | 6-oxopiperidine-2-carboxylate      | 0.62 (1.92E-22)  | 0.50 (3.37E-24)  |
| 31 | 16 | 9:128422557-129422736  | LRRC8A, PHYHD1, SH3GLB2                             | rs55758160  | G/A   | 0.548 | 2'-O-methyluridine                 | 0.72 (1.97E-42)  | NA               |
| 32 |    |                        |                                                     | rs57294583  | G/A   | 0.547 | 2'-O-methylcytidine                | 0.39 (1.97E-12)  | 0.80 (6.88E-69)  |
| 33 | 17 | 11:48528971-49528971   | PTPRJ, FOLH1                                        | rs142514677 | C/CAG | 0.059 | N-acetyl-aspartyl-glutamate        | -0.79 (5.35E-14) | -0.67 (1.57E-09) |
| 34 | 18 | 11:54393863-55393863   | OR4C1                                               | rs150556827 | T/C   | 0.056 | N-acetyl-aspartyl-glutamate        | -0.86 (1.11E-12) | -0.48 (0.04)     |
| 35 | 19 | 11:61320833-62320833   | FADS1, FADS2, TMEM258                               | rs174564    | G/A   | 0.119 | 1-arachidonoyl-GPC (20:4n6)        | -0.54 (3.31E-11) | NA               |
| 36 | 20 | 11:67144985-68144985   | ACY3, AP003385.2                                    | rs115780269 | T/C   | 0.025 | N-acetyltryptophan                 | 1.64 (1.11E-22)  | 1.23 (1.72E-10)  |
| 37 |    |                        |                                                     | rs115780269 | T/C   | 0.025 | N-acetylkynurenine                 | 1.07 (2.18E-12)  | NA               |
| 38 |    |                        |                                                     | rs115780269 | T/C   | 0.025 | N-acetyltyrosine                   | 1.42 (4.15E-17)  | 1.24 (2.79E-10)  |
| 39 |    |                        |                                                     | rs115780269 | T/C   | 0.025 | N-acetylphenylalanine              | 1.39 (8.18E-16)  | NA               |
| 40 | 21 | 12:20701434-21701434   | SLCO1B1                                             | rs114419265 | T/C   | 0.048 | glycochenodeoxycholate glucuronide | 0.93 (1.44E-14)  | NA               |
| 41 | 22 | 12:120242216-121242216 | ACADS, SPPL3,                                       | rs34708625  | C/T   | 0.061 | ethylmalonate                      | 0.90 (5.02E-14)  | NA               |

|    |    |                      |                                 |             |     |       |                          |                 |                 |
|----|----|----------------------|---------------------------------|-------------|-----|-------|--------------------------|-----------------|-----------------|
| 42 | 23 | 17:77706736-78706736 | UNC119B, RP11-173P15.7<br>AFM/D | rs114080902 | T/C | 0.043 | N-formylanthranilic acid | 1.00 (1.80E-13) | 0.89 (9.13E-15) |
|----|----|----------------------|---------------------------------|-------------|-----|-------|--------------------------|-----------------|-----------------|

\* Replication analysis was performed in the ARIC Study for associations that were determined to be novel.

**Table S2.** Correlations between index SNPs and metabolites within distinct genomic loci.

| Distinct Loci | Chromosomal location     | Index SNP   | Associated metabolite                  | Correlation between SNPs                                                            |      |   | Correlations between metabolites                                                        |      |   |
|---------------|--------------------------|-------------|----------------------------------------|-------------------------------------------------------------------------------------|------|---|-----------------------------------------------------------------------------------------|------|---|
| 1             | 1:45907026-47417369      | rs4507958   | 10-undecenoate (11:1n1)                | -0.03                                                                               |      |   | 0.15                                                                                    |      |   |
|               |                          | rs324418    | N-palmitoylglycine                     |                                                                                     |      |   |                                                                                         |      |   |
| 2             | 1:53444415-54444415      | rs79319225  | 3-methyladipate                        | NA                                                                                  |      |   | NA                                                                                      |      |   |
| 3             | 1:118887090-119887090    | rs7528838   | alpha-hydroxyisovalerate               | (same SNP)                                                                          |      |   | 0.89                                                                                    |      |   |
|               |                          | rs7528838   | 2-hydroxy-3-methylvalerate             |                                                                                     |      |   |                                                                                         |      |   |
| 4             | 2:73105659-74173773      | rs7587577   | N-acetylasparagine                     | Range: 0.73 to 1.0<br>Median, 0.98<br>25 <sup>th</sup> -75 <sup>th</sup> (0.73-1.0) |      |   | Range: -0.08 to 0.78;<br>Median, 0.54<br>25 <sup>th</sup> -75 <sup>th</sup> (0.40-0.61) |      |   |
|               |                          | rs7587577   | N-acetyl-3-methylhistidine             |                                                                                     |      |   |                                                                                         |      |   |
|               |                          | rs11126412  | N-acetyl-1-methylhistidine             |                                                                                     |      |   |                                                                                         |      |   |
|               |                          | rs11126412  | N-acetylphenylalanine                  |                                                                                     |      |   |                                                                                         |      |   |
|               |                          | rs13431529  | N2-acetyllysine                        |                                                                                     |      |   |                                                                                         |      |   |
|               |                          | rs13409366  | N-acetylcitrulline                     |                                                                                     |      |   |                                                                                         |      |   |
|               |                          | rs13409366  | N-acetylglutamine                      |                                                                                     |      |   |                                                                                         |      |   |
|               |                          | rs13409366  | N-acetylkynurenine                     |                                                                                     |      |   |                                                                                         |      |   |
|               |                          | rs6546854   | N-acetylleucine                        |                                                                                     |      |   |                                                                                         |      |   |
|               |                          | rs10168931  | N-acetylarginine                       |                                                                                     |      |   |                                                                                         |      |   |
| rs10206899    | N-delta-acetyloronithine |             |                                        |                                                                                     |      |   |                                                                                         |      |   |
| 5             | 2:129396140-130396140    | rs951389793 | cysteinylglycine                       | NA                                                                                  |      |   | NA                                                                                      |      |   |
| 6             | 2: 233257337-234264663   | rs1976391   | biliverdin                             | 1.0                                                                                 |      |   | 0.75                                                                                    |      |   |
|               |                          | rs4148325   | bilirubin (E,E)                        |                                                                                     |      |   |                                                                                         |      |   |
| 7             | 2:236306573-237306573    | rs62184450  | cysteinylglycine                       | NA                                                                                  |      |   | NA                                                                                      |      |   |
| 8             | 3:51489004-52620872      | rs73835707  | N-acetylmethionine                     | -                                                                                   |      |   | -                                                                                       |      |   |
|               |                          | rs73835707  | N-acetylmethionine sulfoxide           | same SNP                                                                            | -    |   | 0.59                                                                                    | -    |   |
|               |                          | rs2229152   | N-acetylalanine                        | 0.96                                                                                | 0.96 | - | 0.41                                                                                    | 0.45 | - |
| 9             | 4:185748013-186748013    | rs1973612   | histidylalanine                        | NA                                                                                  |      |   | NA                                                                                      |      |   |
| 10            | 5:34536259-35536259      | rs344514    | 3-aminoisobutyrate                     | NA                                                                                  |      |   | NA                                                                                      |      |   |
| 11            | 6:125264108-126264108    | rs60132035  | sphingomyelin (d18:1/20:1, d18:2/20:0) | NA                                                                                  |      |   | NA                                                                                      |      |   |
| 12            | 7:100192604-101692604    | rs7780766   | N-acetylhistidine                      | NA                                                                                  |      |   | NA                                                                                      |      |   |
| 13            | 7:141183499-142183499    | rs139981949 | glycohyocholate                        | NA                                                                                  |      |   | NA                                                                                      |      |   |
| 14            | 8:90241098-91241098      | rs76541360  | 1-arachidonoyl-GPI                     | NA                                                                                  |      |   | NA                                                                                      |      |   |

|           |                        |             |                                    |            |      |      |      |   |
|-----------|------------------------|-------------|------------------------------------|------------|------|------|------|---|
| <b>15</b> | 8:143564265-144564265  | rs59095288  | 6-oxopiperidine-2-carboxylate      | NA         | NA   |      |      |   |
| <b>16</b> | 9:128422557-129422736  | rs55758160  | 2'-O-methyluridine                 | 1.00       | 0.07 |      |      |   |
|           |                        | rs57294583  | 2'-O-methylcytidine                |            |      |      |      |   |
| <b>17</b> | 11:48528971-49528971   | rs142514677 | N-acetyl-aspartyl-glutamate        | NA         | NA   |      |      |   |
| <b>18</b> | 11:54393863-55393863   | rs150556827 | N-acetyl-aspartyl-glutamate        | NA         | NA   |      |      |   |
| <b>19</b> | 11:61320833-62320833   | rs174564    | 1-arachidonoyl-GPC (20:4n6)        | NA         | NA   |      |      |   |
| <b>20</b> | 11:67144985-68144985   | rs115780269 | N-acetyltryptophan                 | (same SNP) | -    |      |      |   |
|           |                        | rs115780269 | N-acetylkynurenine                 |            | 0.63 | -    |      |   |
|           |                        | rs115780269 | N-acetyltyrosine                   |            | 0.77 | 0.59 | -    |   |
|           |                        | rs115780269 | N-acetylphenylalanine              |            | 0.73 | 0.69 | 0.76 | - |
| <b>21</b> | 12:20701434-21701434   | rs114419265 | glycochenodeoxycholate glucuronide | NA         | NA   |      |      |   |
| <b>22</b> | 12:120242216-121242216 | rs34708625  | ethylmalonate                      | NA         | NA   |      |      |   |
| <b>23</b> | 17:77706736-78706736   | rs114080902 | N-formylanthranilic acid           | NA         | NA   |      |      |   |

**Table S3.** Allele frequencies in general populations.

| Distinct locus number | Index SNP   | Coded allele in AASK | Coded allele frequency in AASK | Coded allele frequency in general populations |
|-----------------------|-------------|----------------------|--------------------------------|-----------------------------------------------|
| 1                     | rs4507958   | T/A                  | 0.373                          | African = 0.368<br>European = 0.129           |
| 1                     | rs324418    | G/A                  | 0.361                          | African = 0.381<br>European = 0.256           |
| 2                     | rs79319225  | A/G                  | 0.029                          | African = 0.032<br>European = 0.0001          |
| 3                     | rs7528838   | T/A                  | 0.252                          | African = 0.273<br>European = 0.001           |
| 4                     | rs7587577   | T/C                  | 0.547                          | African = 0.548<br>European = 0.228           |
| 4                     | rs11126412  | T/A                  | 0.392                          | African = 0.372<br>European = 0.217           |
| 4                     | rs13431529  | C/G                  | 0.535                          | African = 0.531<br>European = 0.217           |
| 4                     | rs13409366  | G/A                  | 0.547                          | African = 0.548<br>European = 0.231           |
| 4                     | rs6546854   | G/A                  | 0.547                          | African = 0.548<br>European = 0.230           |
| 4                     | rs10168931  | A/G                  | 0.540                          | African = 0.529<br>European = 0.215           |
| 4                     | rs10206899  | C/T                  | 0.545                          | African = 0.556<br>European = 0.223           |
| 5                     | rs951389793 | T/TA                 | 0.014                          | NA                                            |
| 6                     | rs1976391   | G/A                  | 0.453                          | African = 0.449<br>European = 0.318           |
| 6                     | rs4148325   | T/C                  | 0.454                          | African = 0.458<br>European = 0.325           |
| 7                     | rs62184450  | C/A                  | 0.029                          | African = 0.030<br>European = 0.081           |
| 8                     | rs73835707  | C/T                  | 0.021                          | African = 0.016<br>European = 0.000           |
| 8                     | rs2229152   | T/C                  | 0.022                          | African = 0.018<br>European = 0.000           |
| 9                     | rs1973612   | T/C                  | 0.587                          | African = 0.601<br>European=0.519             |
| 10                    | rs344514    | C/T                  | 0.822                          | African = 0.801<br>European=0.998             |
| 11                    | rs60132035  | A/G                  | 0.016                          | African = 0.015<br>European = 0.003           |
| 12                    | rs7780766   | T/C                  | 0.297                          | African = 0.292<br>European = 0.082           |
| 13                    | rs139981949 | T/C                  | 0.018                          | African = 0.023<br>European = 0.000           |
| 14                    | rs76541360  | T/A                  | 0.072                          | African = 0.071<br>European = 0.000           |
| 15                    | rs59095288  | C/T                  | 0.309                          | African = 0.340                               |



|    |             |       |       |                                     |
|----|-------------|-------|-------|-------------------------------------|
|    |             |       |       | European = 0.069                    |
| 16 | rs55758160  | G/A   | 0.548 | African = 0.515<br>European = 0.393 |
| 17 | rs142514677 | C/CAG | 0.059 | African = 0.056<br>European = 0.000 |
| 18 | rs150556827 | T/C   | 0.056 | African = 0.057<br>European = 0.000 |
| 19 | rs174564    | G/A   | 0.119 | African = 0.118<br>European = 0.346 |
| 20 | rs115780269 | T/C   | 0.025 | African = 0.017<br>European = 0.000 |
| 21 | rs114419265 | T/C   | 0.048 | African = 0.035<br>European = 0.000 |
| 22 | rs34708625  | C/T   | 0.061 | African = 0.064<br>European = 0.264 |
| 23 | rs114080902 | T/C   | 0.043 | African = 0.044<br>European = 0.000 |

**Table S4.** Pathway enrichment analysis.

| Super-pathway          | Total N of metabolites evaluated | N of metabolites associated with $\geq 1$ SNP | Fisher Exact p-value | Permutation p-value* |
|------------------------|----------------------------------|-----------------------------------------------|----------------------|----------------------|
| Amino acid             | 180 (28%)                        | 24 (63%)                                      | 7E-06                | 0.005                |
| Nucleotide             | 34 (5%)                          | 3 (8%)                                        | 0.448                | 0.345                |
| Cofactors and vitamins | 23 (4%)                          | 2 (5%)                                        | 0.624                | 0.335                |
| Peptide                | 35 (5%)                          | 1 (3%)                                        | 0.714                | 0.765                |
| Lipid                  | 349 (54%)                        | 8 (21%)                                       | 1E-04                | 0.995                |
| Other                  | 31 (4%)                          | 0 (0%)                                        | -                    | -                    |
| Total                  | 652                              | 38                                            | -                    | -                    |

**Table S5.** Summary of published metabolite GWAS literature.

| Study                     | Metabolites                                                                             | Metabolite platform                 | Study population, N                              | African Americans in study population | CKD in study population and/or (e)GFR                               | Main findings                                                                                                                                                    | Overlap in findings with present study                                                                                                                                                                                                                       |
|---------------------------|-----------------------------------------------------------------------------------------|-------------------------------------|--------------------------------------------------|---------------------------------------|---------------------------------------------------------------------|------------------------------------------------------------------------------------------------------------------------------------------------------------------|--------------------------------------------------------------------------------------------------------------------------------------------------------------------------------------------------------------------------------------------------------------|
| Yousri 2018 <sup>S1</sup> | 1303 serum metabolites                                                                  | Metabolon                           | Consanguineous Middle Eastern population (N=996) | 0%                                    | General population                                                  | 21 common and 12 rare variant metabolic quantitative trait loci found and replicated, 7 of the common mQTLs were novel, all 12 of the rare mQTLs were also novel | ACADS and ethylmalonate, <i>PHYHD1</i> and 2'-O-methyluridine                                                                                                                                                                                                |
| Li 2018 <sup>S2</sup>     | 139 serum metabolites, 41 urine metabolites, pairwise ratios, and fractional excretions | Biocrates Life Sciences AG, Austria | GCKD (N=1143)                                    | 0%                                    | All participants had CKD, mean eGFR = 51 mL/min/1.73 m <sup>2</sup> | Genome-wide significance for 25 serum metabolites, 2 urine metabolites, 259 serum and 14 urine metabolite ratios                                                 | NAT8 and N-acetylornithine                                                                                                                                                                                                                                   |
| Long 2017 <sup>S3</sup>   | 644 serum metabolites including 156 unknown metabolites                                 | Metabolon                           | TwinsUK registry (N=1960)                        | 0%                                    | General population                                                  | Genetic sequence variations at 101 loci associated with the levels of 246 (38%) metabolites (P ≤1.9x10 <sup>-11</sup> )                                          | ACADS and ethylmalonate, NAT8 and N-acetylasparagine, A, NAT8 and N-acetyl-1-methylhistidine, NAT8 and N-acetylphenylalanine, NAT8 and N-acetylcitrulline, NAT8 and N-acetylglutamine, NAT8 and N-delta-acetylornithine, <i>FADS2</i> and 1-arachidonoyl-GPC |

|                          |                                       |                                            |                                                                              |                                |                                                                                     |                                                                                                                                                                                 |                                                                                                                                                                                                                                                                                                                       |
|--------------------------|---------------------------------------|--------------------------------------------|------------------------------------------------------------------------------|--------------------------------|-------------------------------------------------------------------------------------|---------------------------------------------------------------------------------------------------------------------------------------------------------------------------------|-----------------------------------------------------------------------------------------------------------------------------------------------------------------------------------------------------------------------------------------------------------------------------------------------------------------------|
| Davis 2017 <sup>S4</sup> | 72 blood lipid and lipoprotein traits | In-house platform                          | The METSIM study (N=8372)                                                    | 0%                             | General population                                                                  | Five novel genome-wide lipid and lipoprotein subclass association signals near established loci at <i>HIF3A</i> , <i>ADAMTSS3</i> , <i>PLTP</i> , <i>LCAT</i> , and <i>LIPG</i> | (20:4n6), <i>CYP4A11</i> and N-palmitoylglycine, <i>FAAH</i> and N-palmitoylglycine, <i>CYP4A11</i> and 10-undecenoate (11:1n1), <i>API51</i> and N-acetylhistidine, <i>AGXT2</i> and 3-aminoisobutyrate, <i>UGT1A</i> and biliverdin, <i>UGT1A</i> and bilirubin (E,E), <i>FADS2</i> and 1-arachidonoyl-GPC (20:4n6) |
| Rhee 2016 <sup>S5</sup>  | 217 plasma metabolites                | Broad Institute (FHS) and Metabolon (ARIC) | FHS Offspring cohort (N=2076) and ARIC European Americans (N=1528)           | 0%                             | General population                                                                  | Associations between <i>GMPS</i> and xanthosine, <i>HAL</i> and histidine, <i>PAH</i> and phenylalanine, and <i>UPB1</i> and ureidopropionate                                   | None                                                                                                                                                                                                                                                                                                                  |
| Yu 2016 <sup>S6</sup>    | 70 serum amino acids                  | Metabolon                                  | ARIC African Americans (N discovery=1872) and Europeans (N replication=1552) | 100% discovery, 0% replication | General population, mean eGFR = 104.33 mL/min/1.73 m <sup>2</sup> for the discovery | 14 genetic loci-amino acid significant associations found and replicated, 4 of which were novel (DDC and 3-methoxytyrosine, VNN1 and acisoga, <i>ACY1</i>                       | <i>ALMS1P</i> and N-acetylphenylalanine, <i>ACY1</i> and N-acetylalanine                                                                                                                                                                                                                                              |

|                             |                                                                                            |                         |                                 |      |                                                                        |                                                                                                                                                                                                                                                                                                                                         |                                              |
|-----------------------------|--------------------------------------------------------------------------------------------|-------------------------|---------------------------------|------|------------------------------------------------------------------------|-----------------------------------------------------------------------------------------------------------------------------------------------------------------------------------------------------------------------------------------------------------------------------------------------------------------------------------------|----------------------------------------------|
| Yu 2016 <sup>57</sup>       | 308 serum metabolites                                                                      | Metabolon               | ARIC African Americans (N=1361) | 100% | cohort and 91.12 mL/min/1.73 m <sup>2</sup> for the replication cohort | and N-acetylglycine, ACY1 and N-acetylthreonine)                                                                                                                                                                                                                                                                                        | None                                         |
| Kettunen 2016 <sup>58</sup> | 123 blood lipids and metabolites                                                           | In-house platform       | 14 European cohorts (N=24925)   | 0%   | General population                                                     | Loss-of-function variants influence metabolites, some of which are risk predictors or diagnostic biomarkers of disease. For example, loss of function mutations in <i>SLCO1B1</i> elevate the levels of hexadecanedioate, a fatty acid significantly associated with increased blood pressure levels and risk of incident heart failure | None                                         |
| Yet 2016 <sup>59</sup>      | 43 serum metabolites named for the same compounds across Biocrates and Metabolon platforms | Biocrates and Metabolon | TwinsUK registry (N=1001)       | 0%   | General Population                                                     | 16 metabolites showed consistent genetic associations and appear to be robustly measured across metabolomic platforms                                                                                                                                                                                                                   | <i>FADS1</i> and 1-arachidonoyl-GPC (20:4n6) |

|                                  |                                                                     |                                     |                                                           |       |                                   |                                                                                                                                                                                                                                                                                                                                      |      |
|----------------------------------|---------------------------------------------------------------------|-------------------------------------|-----------------------------------------------------------|-------|-----------------------------------|--------------------------------------------------------------------------------------------------------------------------------------------------------------------------------------------------------------------------------------------------------------------------------------------------------------------------------------|------|
| Burkhardt<br>2015 <sup>S10</sup> | 26 amino acids, 36 acylcarnitines and 34 metabolite ratios in blood | In-house platform                   | LIFE Leipzig Heart Study (N=2107)                         | 0%    | General population / CAD patients | Six novel loci associated with blood levels of total acylcarnitine, arginine (both on chromosome 6; rs12210538, rs17657775), propionylcarnitine (chromosome 10; rs12779637), 2-hydroxyisovalerylcarnitine (chromosome 21; rs1571700), stearoylcarnitine (chromosome 1; rs3811444), and aspartic acid traits (chromosome 8; rs750472) | None |
| Kraus<br>2015 <sup>S11</sup>     | 63 blood metabolites                                                | In-house platform                   | CATHGEN study (N=3512)                                    | 19.1% | Cardiac catheterization patients  | The UPS arm of the ER stress pathway was implicated in CVD pathogenesis                                                                                                                                                                                                                                                              | None |
| Draisma<br>2015 <sup>S12</sup>   | 129 serum metabolites                                               | Biocrates Life Sciences AG, Austria | 7 European cohorts (N discovery=7478, N replication=1182) | 0%    | General population                | 5 of 59 identified SNP-metabolite associations were novel, which were located in or near genes encoding metabolite transporter proteins or enzymes ( <i>SLC22A16</i> , <i>ARG1</i> , <i>AGPS</i> and <i>ACSL1</i> ), and demonstrated biomedical or pharmaceutical importance                                                        | None |

|                              |                                                                                                                              |                         |                                                |      |                                            |                                                                                                                                                                                                                                                                                                                                                                                                                           |                                                                                                                                          |
|------------------------------|------------------------------------------------------------------------------------------------------------------------------|-------------------------|------------------------------------------------|------|--------------------------------------------|---------------------------------------------------------------------------------------------------------------------------------------------------------------------------------------------------------------------------------------------------------------------------------------------------------------------------------------------------------------------------------------------------------------------------|------------------------------------------------------------------------------------------------------------------------------------------|
| Demirkan 2015 <sup>S13</sup> | 42 serum metabolites                                                                                                         | In-house platform       | ERF (N=2482)                                   | 0%   | General population                         | Replicated three known loci in the metabolome wide significance: <i>CPS1</i> with glycine, <i>PRODH</i> with proline, <i>SLC16A9</i> with carnitine and a novel association between <i>DMGDH</i> and dimethylglycine. Three novel, suggestively significant loci: <i>TNP1</i> with pyruvate, <i>KCNJ16</i> with 3-hydroxybutyrate and 2p12 locus with valine                                                              | None                                                                                                                                     |
| Ried 2014 <sup>S14</sup>     | 151 serum metabolites using BIOCRATES AbsolutelIDQTM p150 kit and 193 serum metabolites measured with technique by Metabolon | Biocrates and Metabolon | KORA F4 (N=1814) and TwinsUK (N not described) | 0%   | General population                         | 12 new genes were identified and validated using phenotype set enrichment analysis                                                                                                                                                                                                                                                                                                                                        | None                                                                                                                                     |
| Yu 2014 <sup>S15</sup>       | 308 serum metabolites                                                                                                        | Metabolon               | ARIC African Americans (N=1260)                | 100% | Mean eGFR = 105 mL/min/1.73 m <sup>2</sup> | 14 genes mapped within 19 loci, including 12 enzyme-encoding genes ( <i>KLKB1</i> , <i>SIAE</i> , <i>CPS1</i> , <i>NAT8</i> , <i>ACE</i> , <i>GATM</i> , <i>ACY3</i> , <i>ACSM2B</i> , <i>THEM4</i> , <i>ADH4</i> , <i>UGT1A</i> , <i>TREH</i> ) and a polycystin protein gene ( <i>PKD2L1</i> ); 4 potential disease-associated paths including <i>NAT8</i> ->N-acetylmethionine->CKD, <i>TREH</i> ->trehalose->diabetes | <i>UGT1A</i> and biliverdin, <i>UGT1A</i> and bilirubin (E,E), <i>ACY3</i> and N-acetylphenylalanine, <i>NAT8</i> and N-acetylmethionine |

|                          |                                                                                                                                                                                                                              |                   |                                                 |    |                          |                                                                                                                                                                                                                                                                                                                                                                                                                               |                                                                                                                 |
|--------------------------|------------------------------------------------------------------------------------------------------------------------------------------------------------------------------------------------------------------------------|-------------------|-------------------------------------------------|----|--------------------------|-------------------------------------------------------------------------------------------------------------------------------------------------------------------------------------------------------------------------------------------------------------------------------------------------------------------------------------------------------------------------------------------------------------------------------|-----------------------------------------------------------------------------------------------------------------|
| Shin 2014 <sup>S16</sup> | 486 blood metabolites including 309 known and 177 unknown metabolites                                                                                                                                                        | Metabolon         | KORA (N=1768) and TwinsUK (N=6054)              | 0% | General population       | Genome-wide significant associations at 145 metabolic loci and their biochemical connectivity with more than 400 metabolites in human blood                                                                                                                                                                                                                                                                                   | CYP4A11 and 10-undecenoate, HAO2 and alpha-hydroxyisovalerate, NAT8 and N-acetylorithine, UGT1A1 and biliverdin |
| Rhee 2013 <sup>S17</sup> | 217 plasma metabolites                                                                                                                                                                                                       | In-house platform | FHS (N=2076)                                    | 0% | General Population       | 31 genetic loci associated with plasma metabolites, including 23 that have not previously been reported. Results highlight the role of AGXT2 in cholesterol ester and triacylglycerol metabolism                                                                                                                                                                                                                              | AGXT2 and $\beta$ -aminoisobutyric acid                                                                         |
| Hong 2013 <sup>S18</sup> | 6138 unique molecular features from UPLC-MS were retained for genetic association testing. The molecular identities of the most strongly replicating features for each locus were determined according to a defined workflow | In-house platform | CAPS study (N discovery=492, N replication=489) | 0% | Prostate cancer patients | Seven loci (PYROXD2, FADS1, PON1, CYP4F2, UGT1A8, ACADL, and LIPC) with associated sequence variants contributing significantly to trait variance for one or more metabolites. Regional mQTL enrichment analyses implicated two loci that included FADS1 and a novel locus near PDGFC. Biological pathway analysis implicated ACADM, ACADS, ACAD8, ACAD10, ACAD11, and ACOXL, reflecting significant enrichment of genes with | UGT1A8 and bilirubin; SLCO1B1 and glycochenodeoxycholic acid 3-glucuronide                                      |



|                               |                                                                                                 |                   |                                                    |    |                    |                                                                                                                                                                                                                                                                           |                            |
|-------------------------------|-------------------------------------------------------------------------------------------------|-------------------|----------------------------------------------------|----|--------------------|---------------------------------------------------------------------------------------------------------------------------------------------------------------------------------------------------------------------------------------------------------------------------|----------------------------|
| Kettunen 2012 <sup>S19</sup>  | 216 serum metabolic phenotypes (including metabolite levels and ratios)                         | In-house platform | 5 Finnish population-based cohorts (N=8330)        | 0% | General population | acyl-CoA dehydrogenase activity<br>31 loci, including 11 for which there have not been previous reports of associations to a metabolic trait or disorder. Analysis of twin pairs showed higher heritability of metabolic measures reported than conventional phenotypes   | None                       |
| Tukiainen 2012 <sup>S20</sup> | 117 serum metabolites, 99 derived measures and 4 enzymatic lipid measures                       | In-house platform | 5 Finnish population-based cohorts (N=8330)        | 0% | General population | New metabolic or genetic associations were identified for 30 of the 95 known lipid loci                                                                                                                                                                                   | None                       |
| Krumsiek 2012 <sup>S21</sup>  | 225 unknown metabolites                                                                         | Metabolon         | German KORA F4 study (N=1768)                      | 0% | General population | Overlying inferred genetic associations, metabolic networks, and knowledge-based pathway information, testable hypotheses were formed for the biochemical identities of 106 unknown metabolites. Nine concrete predictions experimentally confirmed as proof of principle | <i>UGT1A</i> and bilirubin |
| Inouye 2012 <sup>S22</sup>    | 130 metabolites and 11 metabolic networks derived using "agglomerative hierarchical clustering" | In-house platform | Young Finns Study (N=1905) and the NFB666 (N=4703) | 0% | General population | 34 genomic loci at genome-wide significance, of which 7 are novel. In comparison to univariate tests, multivariate                                                                                                                                                        | None                       |

|                                     |                                                                                                                                                                                                                          |                                     |                                          |    |                    |                                                                                                                                                                                                                                                            |                                                                                           |
|-------------------------------------|--------------------------------------------------------------------------------------------------------------------------------------------------------------------------------------------------------------------------|-------------------------------------|------------------------------------------|----|--------------------|------------------------------------------------------------------------------------------------------------------------------------------------------------------------------------------------------------------------------------------------------------|-------------------------------------------------------------------------------------------|
| Demirkan<br>2012 <sup>S23</sup>     | Plasma levels of 24 sphingomyelins, 9 ceramides, 57 phosphatidylcholines, 20 lysophosphatidylcholines, 27 phosphatidylethanolamines (PE), and 16 PE-based plasmalogens, as well as their proportions in each major class | In-house platform                   | 5 European family-based studies (N=4034) | 0% | General population | association analysis identified nearly twice as many significant associations in total                                                                                                                                                                     | None                                                                                      |
| Suhre<br>2011 <sup>S24</sup>        | 250 serum metabolites, >30,000 ratios                                                                                                                                                                                    | Metabolon                           | KORA F4 (N=1768) and TwinsUK (N=1052)    | 0% | General population | 37 independent loci reached genome-wide significance in meta-analysis, 23 of which described new genetic associations with metabolic traits. 14 of the new associations were replicated and extended knowledge of known genetically determined metabolites | NAT8 and N-acetylorntithine, UGT1A and bilirubin (E,E), CYP4A and 10-undecenoate (11:1n1) |
| Mittelstrass<br>2011 <sup>S25</sup> | 131 serum metabolites                                                                                                                                                                                                    | Biocrates Life Sciences AG, Austria | KORA F3 and F4 (N=3300)                  | 0% | General population | Genome-wide significant sex-specific differences SNPs in the <i>CPS1</i> locus for glycine                                                                                                                                                                 | None                                                                                      |

|                               |                                                                                                                                                         |                                     |                                                                        |    |                    |                                                                                                                                                                                                                                                                                                                                                                                                                                                                    |                                                                                               |
|-------------------------------|---------------------------------------------------------------------------------------------------------------------------------------------------------|-------------------------------------|------------------------------------------------------------------------|----|--------------------|--------------------------------------------------------------------------------------------------------------------------------------------------------------------------------------------------------------------------------------------------------------------------------------------------------------------------------------------------------------------------------------------------------------------------------------------------------------------|-----------------------------------------------------------------------------------------------|
| Nicholson 2011 <sup>S26</sup> | 526 plasma or urine metabolite peaks, 4 were driven largely by SNP variation, of which 3 were unambiguously identified and one was partially identified | In-house technique and Biocrates    | MolTWIN (N=142 female twins), the MoIOBB cohort, Oxford Biobank (N=69) | 0% | General population | Replicated mQTL findings of previous study (Illig 2010) and discovered a previously uncharacterized yet substantial familial component of variation in metabolite levels in addition to the heritability contribution from the corresponding mQTL effects                                                                                                                                                                                                          | None (MAT8 was associated with urine N-acetylmethionine, AGXT2 with urine 3-aminoisobutyrate) |
| Illig 2010 <sup>S27</sup>     | 163 serum metabolites and all 26,406 possible metabolite ratios                                                                                         | Biocrates Life Sciences AG, Austria | KORA (N discovery=1809), TwinsUK (N replication=422)                   | 0% | General population | Eight out of nine replicated loci ( <i>FADS1</i> , <i>ELOVL2</i> , <i>ACADS</i> , <i>ACADM</i> , <i>ACADL</i> , <i>SPTLC3</i> , <i>ETFDH</i> and <i>SLC16A9</i> ), the genetic variant is located in or near genes encoding enzymes or solute carriers whose functions match the associating metabolic traits. The use of metabolite concentration ratios as proxies for enzymatic reaction rates reduced the variance and yielded robust statistical associations | None                                                                                          |
| Gieger 2008 <sup>S28</sup>    | 363 serum metabolites                                                                                                                                   | Biocrates Life Sciences AG, Austria | KORA S3 (N=284)                                                        | 0% | General population | 4 genetic variants in genes coding for enzymes ( <i>FADS1</i> , <i>LIPC</i> , <i>SCAD</i> , <i>MCAD</i> ) where the                                                                                                                                                                                                                                                                                                                                                | None                                                                                          |

|  |  |  |  |  |  |  |                                                                                                              |  |
|--|--|--|--|--|--|--|--------------------------------------------------------------------------------------------------------------|--|
|  |  |  |  |  |  |  | corresponding metabolic phenotype clearly matches the biochemical pathways in which these enzymes are active |  |
|--|--|--|--|--|--|--|--------------------------------------------------------------------------------------------------------------|--|

ARIC, Atherosclerosis Risk in Communities; CAPS, Cancer of the Prostate in Sweden; CATHGEN, Catheterization Genetics; ERF, Erasmus Rucphen Family; FHS, Framingham Heart Study; KORA, Cooperative Health Research in the Augsburg Region; METSIM, Metabolic Syndrome in Men.

**Table S6.** Novel Index SNP-metabolite associations in AASK and replication in African Americans in the ARIC Study (N=818).

| index SNP   | Associated metabolites                 | Metabolite measured in the ARIC Study | Coded allele in the ARIC Study | Coded allele frequency in the ARIC Study | Metabolite missingness in the ARIC Study | Beta coefficient in the ARIC Study (P-value) | Replicated? |
|-------------|----------------------------------------|---------------------------------------|--------------------------------|------------------------------------------|------------------------------------------|----------------------------------------------|-------------|
| rs79319225  | 3-methyladipate                        | Yes                                   | A/G                            | 0.03                                     | 145/818                                  | -0.12 (0.43)                                 | No          |
| rs7528838   | 2-hydroxy-3-methylvalerate             | Yes                                   | T/A                            | 0.27                                     | 0/818                                    | -0.27 (5.97E-07)                             | Yes         |
| rs13431529  | N2-acetyllysine                        | Yes                                   | C/G                            | 0.52                                     | 232/818                                  | 0.62 (1.18E-45)                              | Yes         |
| rs13409366  | N-acetylkynurenine                     | No                                    | NA                             | NA                                       | NA                                       | NA                                           | NA          |
| rs6546854   | N-acetylleucine                        | Yes                                   | G/A                            | 0.54                                     | 8/818                                    | 0.57 (1.39E-34)                              | Yes         |
| rs10168931  | N-acetylarginine                       | Yes                                   | A/G                            | 0.54                                     | 0/818                                    | 0.68 (2.85E-49)                              | Yes         |
| rs951389793 | cysteinylglycine                       | Yes                                   | T/TA                           | 0.01                                     | 0/818                                    | 0.01 (0.97)                                  | No          |
| rs62184450  | cysteinylglycine                       | Yes                                   | C/A                            | 0.03                                     | 0/818                                    | -0.20 (0.18)                                 | No          |
| rs73835707  | N-acetylmethionine                     | Yes                                   | C/T                            | 0.02                                     | 0/818                                    | 1.31 (7.12E-15)                              | Yes         |
| rs73835707  | N-acetylmethionine sulfoxide           | No                                    | NA                             | NA                                       | NA                                       | NA                                           | NA          |
| rs1973612   | histidylalanine                        | Yes                                   | T/C                            | 0.59                                     | 738/818                                  | 0.04 (0.16)                                  | No          |
| rs60132035  | sphingomyelin (d18:1/20:1, d18:2/20:0) | Yes                                   | A/G                            | 0.01                                     | 0/818                                    | -0.23 (0.27)                                 | No          |
| rs139981949 | glycocholate                           | Yes                                   | T/C                            | 0.01                                     | 261/818                                  | -0.17 (0.38)                                 | No          |
| rs76541360  | 1-arachidonoyl-GPI                     | Yes                                   | T/A                            | 0.07                                     | 0/818                                    | 0.16 (0.10)                                  | No          |
| rs59095288  | 6-oxopiperidine-2-carboxylate          | Yes                                   | C/T                            | 0.34                                     | 7/818                                    | 0.50 (3.37E-24)                              | Yes         |
| rs57294583  | 2'-O-methylcytidine                    | Yes                                   | G/A                            | 0.53                                     | 9/818                                    | 0.80 (6.88E-69)                              | Yes         |
| rs142514677 | N-acetyl-aspartyl-glutamate            | Yes                                   | C/CAG                          | 0.04                                     | 124/818                                  | -0.67 (1.57E-09)                             | Yes         |
| rs150556827 | N-acetyl-aspartyl-l-glutamate          | Yes                                   | T/C                            | 0.01                                     | 124/818                                  | -0.48 (0.04)                                 | No          |
| rs115780269 | N-acetyltryptophan                     | Yes                                   | C/T                            | 0.02                                     | 40/818                                   | 1.23 (1.72E-10)                              | Yes         |
| rs115780269 | N-acetylkynurenine                     | No                                    | NA                             | NA                                       | NA                                       | NA                                           | NA          |
| rs115780269 | N-acetyltyrosine                       | Yes                                   | T/C                            | 0.02                                     | 33/818                                   | 1.24 (2.79E-10)                              | Yes         |
| rs114080902 | N-formylanthranilic acid               | Yes                                   | T/C                            | 0.04                                     | 0/818                                    | 0.89 (9.13E-15)                              | Yes         |

**Table S7.** Most likely causal genes for novel variant-metabolite associations identified in AASK and replicated in the ARIC Study and whether genes are enzyme encoding.

| Gene          | Enzyme encoding? |
|---------------|------------------|
| <i>HAO2</i>   | Yes              |
| <i>NAT8</i>   | Yes              |
| <i>ACY1</i>   | Yes              |
| <i>EXOSC4</i> | Yes              |
| <i>GPAA1</i>  | No               |
| <i>PHYHD1</i> | Yes              |
| <i>ACY3</i>   | Yes              |
| <i>AFMID</i>  | Yes              |

**Table S8.** Interactions between index single nucleotide polymorphisms and glomerular filtration rate.

| Distinct locus number | Genomic locus number; chromosomal location; mapped genes | Index SNP        | Index SNP coded allele/reference allele | Index SNP coded allele frequency | Associated metabolites                 | Beta coefficient for index SNP (P-value)* | Beta coefficient for measured GFR (P-value) | Beta coefficient for interaction term between index SNP and GFR (P-value)* |
|-----------------------|----------------------------------------------------------|------------------|-----------------------------------------|----------------------------------|----------------------------------------|-------------------------------------------|---------------------------------------------|----------------------------------------------------------------------------|
| 3                     | <b>1:118887090-119887090; HAO2</b>                       | <b>rs7528838</b> | <b>T/A</b>                              | <b>0.252</b>                     | <b>2-hydroxy-3-methylvalerate</b>      | <b>-0.238 (6.81E-13)</b>                  | <b>0.001 (0.515)</b>                        | <b>0.007 (0.006)</b>                                                       |
| 4                     | 2:73105659-74173773; ALMS1, ALMS1P, NAT8, TPRKB          | rs13431529       | C/G                                     | 0.535                            | N2-acetyllysine                        | -0.198 (4.94E-08)                         | -0.018 (1.33E-15)                           | -0.004 (0.165)                                                             |
|                       |                                                          | rs6546854        | G/A                                     | 0.547                            | N-acetylleucine                        | -0.058 (0.001)                            | -0.008 (1.52E-15)                           | 0.001 (0.553)                                                              |
|                       |                                                          | rs10168931       | A/G                                     | 0.540                            | N-acetylariginine                      | -0.125 (9.06E-08)                         | -0.013 (2.17E-18)                           | -0.001 (0.583)                                                             |
| 8                     | 3:51489004-52620872; POC1A, ACY1, ABHD14A-ACY1           | rs73835707       | C/T                                     | 0.021                            | N-acetylmethionine                     | 1.096 (8.20E-12)                          | -0.019 (9.06E-13)                           | 0.011 (0.495)                                                              |
|                       |                                                          | rs59095288       | C/T                                     | 0.309                            | 6-oxopiperidine-2-carboxylate          | 0.311 (5.73E-23)                          | -0.006 (2.73E-04)                           | -0.004 (0.090)                                                             |
| 16                    | 9:128422557-129422736; LRRRC8A, PHYHD1, SH3GLB2          | rs57294583       | G/A                                     | 0.547                            | 2'-O-methylcytidine                    | 0.007 (0.809)                             | 0.005 (0.003)                               | -0.003 (0.162)                                                             |
|                       |                                                          | rs142514677      | C/CAG                                   | 0.059                            | N-acetyl-aspartyl-glutamate (NAAG)     | -0.391 (6.03E-12)                         | -0.005 (1.90E-04)                           | 0.006 (0.172)                                                              |
| 20                    | 11:67144985-68144985;                                    | rs115780269      | T/C                                     | 0.025                            | N-acetyltryptophan<br>N-acetyltyrosine | 1.56 (2.09E-34)<br>1.165 (1.21E-23)       | -0.011 (3.61E-07)<br>-0.014 (7.27E-12)      | 0 (0.963)<br>0.016 (0.089)                                                 |

|    |                                                        |             |     |       |                          |                  |                  |           |
|----|--------------------------------------------------------|-------------|-----|-------|--------------------------|------------------|------------------|-----------|
| 23 | ACY3,<br>AP003385.2<br>17:77706736-<br>78706736; AFMID | rs114080902 | T/C | 0.043 | N-formylanthranilic acid | 0.671 (8.18E-22) | -0.01 (1.50E-10) | 0 (0.969) |
|----|--------------------------------------------------------|-------------|-----|-------|--------------------------|------------------|------------------|-----------|

\* **Bold font** indicates nominally significantly stronger (P<0.05) index-SNP association with lower measured GFR.

Beta coefficient for index SNP.



**Table S9.** Metabolites with replicated novel associations and correlation coefficients with GFR in AASK.

| Associated metabolites             | Spearman correlation coefficient |
|------------------------------------|----------------------------------|
| 2-hydroxy-3-methylvalerate         | 0.03                             |
| N2-acetyllysine                    | -0.28                            |
| N-acetylleucine                    | -0.35                            |
| N-acetylarginine                   | -0.34                            |
| N-acetylmethionine                 | -0.21                            |
| 6-oxopiperidine-2-carboxylate      | -0.12                            |
| 2'-O-methylcytidine                | 0.08                             |
| N-acetyl-aspartyl-glutamate (NAAG) | -0.08                            |
| N-acetyltryptophan                 | -0.16                            |
| N-acetyltyrosine                   | -0.18                            |
| N-formylanthranilic acid           | -0.23                            |

**Table S10.** Metabolite missingness and index SNP-metabolite associations after excluding missing values, re-quantifying metabolite level as an ordinary variable (1=missing, 2=below median, 3=equal to or above median), or re-imputing missing values using missing data principal components and a k-nearest neighbor method for metabolites detected in <90% of samples in AASK.

| Distinct variant-metabolite association | index SNP   | Associated metabolites     | Metabolite missingness in AASK | Beta coefficient with missing values imputed with lowest detectable value (P-value) | Beta coefficient after excluding missing values (P-value) | Beta coefficient after re-quantifying metabolite level as ordinal variable (P-value) | Beta coefficient after imputing missing values using missing data principal components and a 25-nearest neighbor method (P-value) |
|-----------------------------------------|-------------|----------------------------|--------------------------------|-------------------------------------------------------------------------------------|-----------------------------------------------------------|--------------------------------------------------------------------------------------|-----------------------------------------------------------------------------------------------------------------------------------|
| 1                                       | rs4507958   | 10-undecenoate (11:1n1)    | 0/619                          | NA*                                                                                 | NA                                                        | NA                                                                                   | NA                                                                                                                                |
| 2                                       | rs324418    | N-palmitoylglycine         | 26/619                         | NA                                                                                  | NA                                                        | NA                                                                                   | NA                                                                                                                                |
| 3                                       | rs79319225  | 3-methyladipate            | 438/619                        | <b>0.75 (1.29E-10)</b>                                                              | <b>0.76 (8.10E-05)</b>                                    | <b>0.76 (8.10E-05)</b>                                                               | <b>0.54 (5.19E-04)</b>                                                                                                            |
| 4                                       | rs7528838   | alpha-hydroxyisovalerate   | 0/619                          | NA                                                                                  | NA                                                        | NA                                                                                   | NA                                                                                                                                |
| 5                                       | rs7528838   | 2-hydroxy-3-methylvalerate | 1/619                          | NA                                                                                  | NA                                                        | NA                                                                                   | NA                                                                                                                                |
| 6                                       | rs7587577   | N-acetylasparagine         | 0/619                          | NA                                                                                  | NA                                                        | NA                                                                                   | NA                                                                                                                                |
| 7                                       | rs7587577   | N-acetyl-3-methylhistidine | 101/619                        | <b>0.39 (6.11E-13)</b>                                                              | <b>0.35 (1.09E-07)</b>                                    | <b>0.16 (6.59E-07)</b>                                                               | <b>0.54 (1.92E-22)</b>                                                                                                            |
| 8                                       | rs11126412  | N-acetyl-1-methylhistidine | 10/619                         | NA                                                                                  | NA                                                        | NA                                                                                   | NA                                                                                                                                |
| 9                                       | rs11126412  | N-acetylphenylalanine      | 0/619                          | NA                                                                                  | NA                                                        | NA                                                                                   | NA                                                                                                                                |
| 10                                      | rs13431529  | N2-acetyllysine            | 56/619                         | NA                                                                                  | NA                                                        | NA                                                                                   | NA                                                                                                                                |
| 11                                      | rs13409366  | N-acetylcitrulline         | 1/619                          | NA                                                                                  | NA                                                        | NA                                                                                   | NA                                                                                                                                |
| 12                                      | rs13409366  | N-acetylglutamine          | 0/619                          | NA                                                                                  | NA                                                        | NA                                                                                   | NA                                                                                                                                |
| 13                                      | rs13409366  | N-acetylkynurenine         | 177/619                        | <b>0.33 (7.26E-37)</b>                                                              | <b>0.39 (5.29E-09)</b>                                    | <b>0.15 (1.03E-05)</b>                                                               | <b>0.32 (9.27E-09)</b>                                                                                                            |
| 14                                      | rs6546854   | N-acetylleucine            | 1/619                          | NA                                                                                  | NA                                                        | NA                                                                                   | NA                                                                                                                                |
| 15                                      | rs10168931  | N-acetylmethionine         | 1/619                          | NA                                                                                  | NA                                                        | NA                                                                                   | NA                                                                                                                                |
| 16                                      | rs10206899  | N-delta-acetylornithine    | 0/619                          | NA                                                                                  | NA                                                        | NA                                                                                   | NA                                                                                                                                |
| 17                                      | rs951389793 | cysteinylglycine           | 468/619                        | <b>1.12 (1.42E-10)</b>                                                              | <b>0.68 (0.02)</b>                                        | <b>0.11 (0.23)</b>                                                                   | <b>0.90 (2.2E-04)</b>                                                                                                             |
| 18                                      | rs1976391   | biliverdin                 | 2/619                          | NA                                                                                  | NA                                                        | NA                                                                                   | NA                                                                                                                                |

|    |             |                                        |         |                        |                        |                        |                        |                        |                        |    |
|----|-------------|----------------------------------------|---------|------------------------|------------------------|------------------------|------------------------|------------------------|------------------------|----|
| 19 | rs4148325   | bilirubin (E,E)                        | 4/619   | NA                     | NA                     | NA                     | NA                     | NA                     | NA                     | NA |
| 20 | rs62184450  | cysteinylglycine                       | 468/619 | <b>0.77 (1.80E-10)</b> | 0.44 (0.03)            | 0.10 (0.36)            | 0.44 (0.03)            | 0.10 (0.36)            | <b>0.44 (0.009)</b>    | NA |
| 21 | rs73835707  | N-acetylmethionine                     | 18/619  | NA                     | NA                     | NA                     | NA                     | NA                     | NA                     | NA |
| 22 | rs73835707  | N-acetylmethionine sulfoxide           | 252/619 | <b>1.24 (6.06E-13)</b> | <b>0.99 (7.38E-07)</b> | <b>0.36 (3.89E-04)</b> | <b>0.99 (7.38E-07)</b> | <b>0.36 (3.89E-04)</b> | <b>1.08 (2.53E-08)</b> | NA |
| 23 | rs2229152   | N-acetylaniline                        | 0/619   | NA                     | NA                     | NA                     | NA                     | NA                     | NA                     | NA |
| 24 | rs1973612   | histidylalanine                        | 3/619   | NA                     | NA                     | NA                     | NA                     | NA                     | NA                     | NA |
| 25 | rs344514    | 3-aminoisobutyrate                     | 0/619   | NA                     | NA                     | NA                     | NA                     | NA                     | NA                     | NA |
| 26 | rs60132035  | sphingomyelin (d18:1/20:1, d18:2/20:0) | 0/619   | NA                     | NA                     | NA                     | NA                     | NA                     | NA                     | NA |
| 27 | rs7780766   | N-acetylhistidine                      | 3/619   | NA                     | NA                     | NA                     | NA                     | NA                     | NA                     | NA |
| 28 | rs139981949 | glycohyocholate                        | 112/619 | <b>1.21 (9.15E-12)</b> | <b>1.09 (2.52E-08)</b> | <b>0.41 (5.31E-05)</b> | <b>1.09 (2.52E-08)</b> | <b>0.41 (5.31E-05)</b> | <b>1.19 (1.38E-09)</b> | NA |
| 29 | rs76541360  | 1-arachidonoyl-GPI                     | 0/619   | NA                     | NA                     | NA                     | NA                     | NA                     | NA                     | NA |
| 30 | rs59095288  | 6-oxopiperidine-2-carboxylate          | 18/619  | NA                     | NA                     | NA                     | NA                     | NA                     | NA                     | NA |
| 31 | rs55758160  | 2'-O-methyluridine                     | 12/619  | NA                     | NA                     | NA                     | NA                     | NA                     | NA                     | NA |
| 32 | rs57294583  | 2'-O-methylcytidine                    | 22/619  | NA                     | NA                     | NA                     | NA                     | NA                     | NA                     | NA |
| 33 | rs142514677 | N-acetyl-aspartyl-glutamate            | 49/619  | NA                     | NA                     | NA                     | NA                     | NA                     | NA                     | NA |
| 34 | rs150556827 | N-acetyl-aspartyl-glutamate            | 49/619  | NA                     | NA                     | NA                     | NA                     | NA                     | NA                     | NA |
| 35 | rs174564    | 1-arachidonoyl-GPC (20:4n6)            | 0/619   | NA                     | NA                     | NA                     | NA                     | NA                     | NA                     | NA |
| 36 | rs115780269 | N-acetyltryptophan                     | 45/619  | NA                     | NA                     | NA                     | NA                     | NA                     | NA                     | NA |
| 37 | rs115780269 | N-acetylkynurenine                     | 177/619 | <b>1.07 (2.18E-12)</b> | <b>1.08 (2.13E-09)</b> | <b>0.37 (9.45E-05)</b> | <b>1.08 (2.13E-09)</b> | <b>0.37 (9.45E-05)</b> | <b>1.16 (1.60E-11)</b> | NA |
| 38 | rs115780269 | N-acetyltyrosine                       | 76/619  | <b>1.42 (4.15E-17)</b> | <b>1.48 (2.40E-16)</b> | <b>0.38 (4.74E-05)</b> | <b>1.48 (2.40E-16)</b> | <b>0.38 (4.74E-05)</b> | <b>1.48 (5.43E-17)</b> | NA |
| 39 | rs115780269 | N-acetylphenylalanine                  | 0/619   | NA                     | NA                     | NA                     | NA                     | NA                     | NA                     | NA |
| 40 | rs114419265 | glycochenodeoxycholate glucuronide     | 54/619  | NA                     | NA                     | NA                     | NA                     | NA                     | NA                     | NA |
| 41 | rs34708625  | ethylmalonate                          | 0/619   | NA                     | NA                     | NA                     | NA                     | NA                     | NA                     | NA |
| 42 | rs114080902 | N-formylanthranilic acid               | 5/619   | NA                     | NA                     | NA                     | NA                     | NA                     | NA                     | NA |

\* NA, sensitivity analysis not conducted for the index SNP-metabolite association because of low level of missingness (<10%) of the metabolite.

**Bold font** indicates statistical significance ( $P < 0.05/9$ ).

**Figure S1.** Regional association plots for locus-metabolite associations (N=42).

a. Locus 1, rs4507958 and 10-undecenoate (11:1n1).

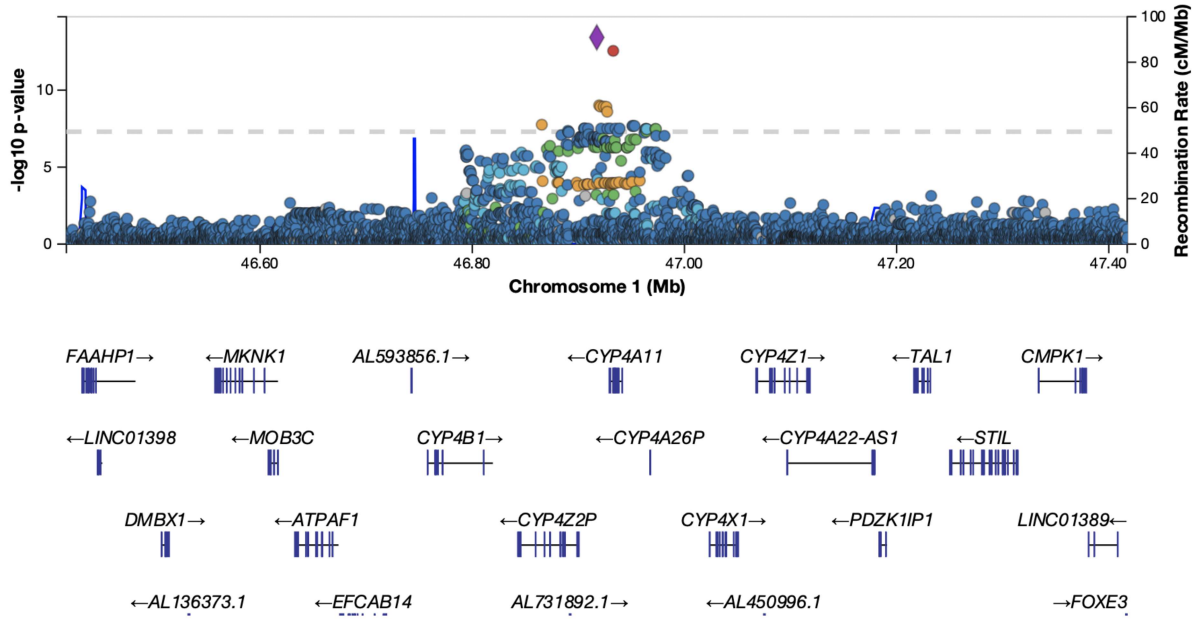

b. Locus 1, rs324418 and N-palmitoylglycine.

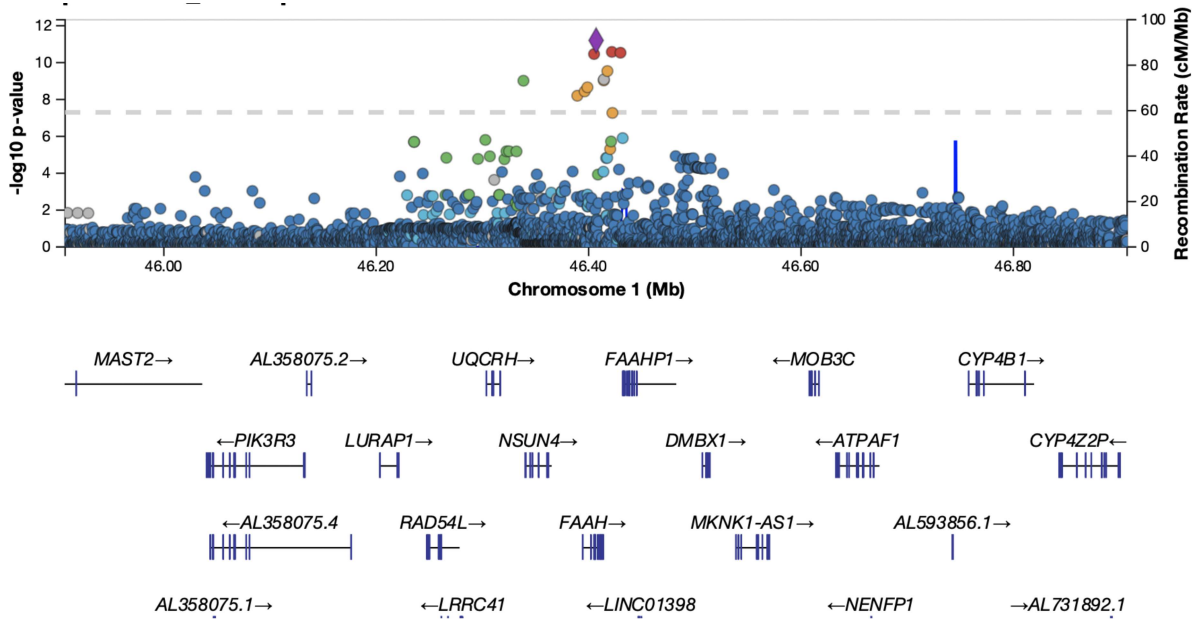

c. Locus 2, rs79319225 and 3-methyladipate.

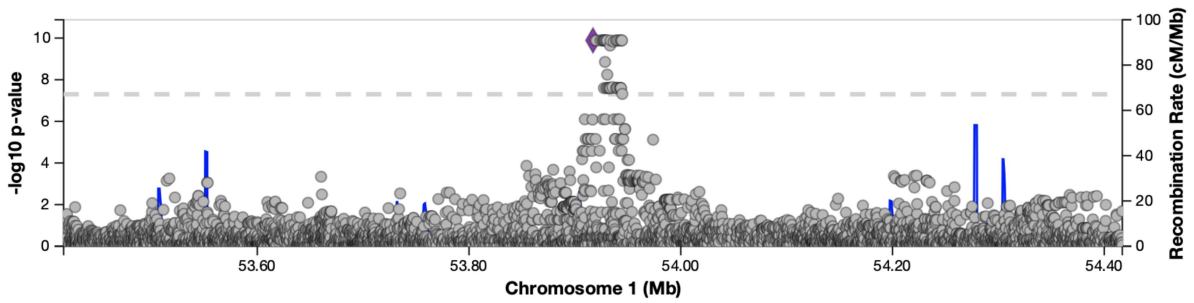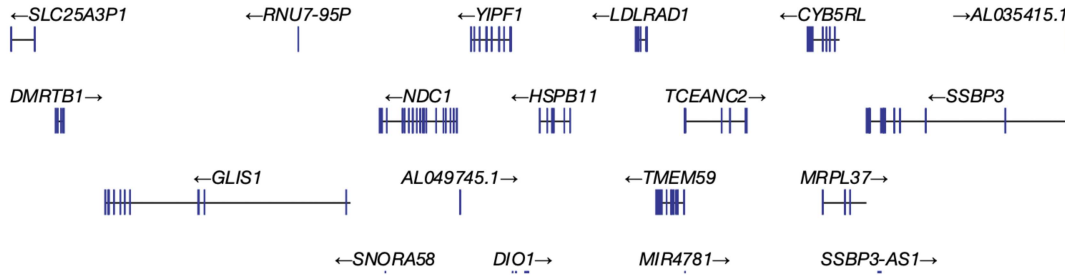

d. Locus 3, rs7528838 and alpha-hydroxyisovalerate.

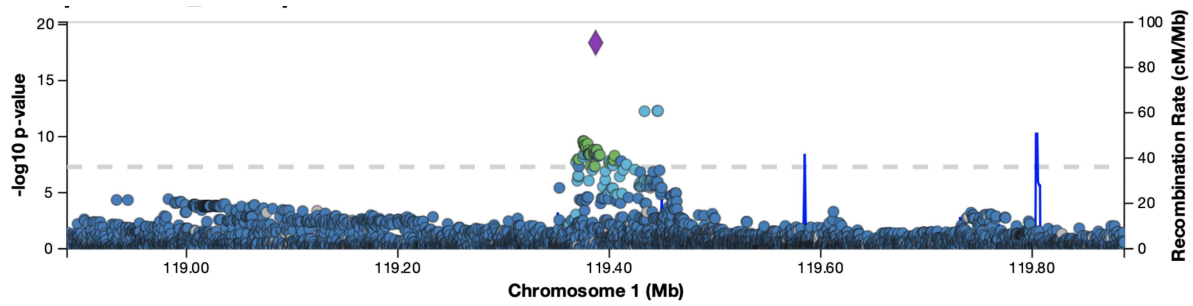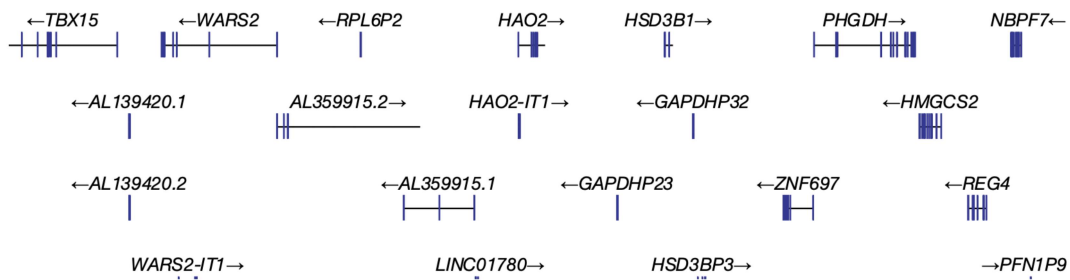

e. Locus 3, rs7528838 and 2-hydroxy-3-methylvalerate.

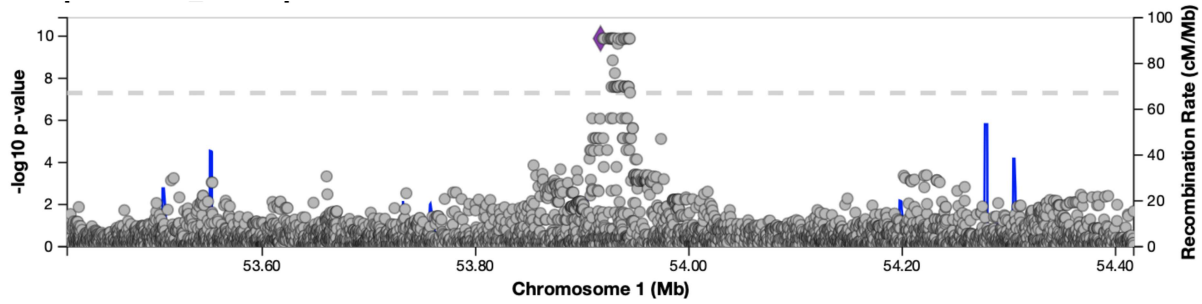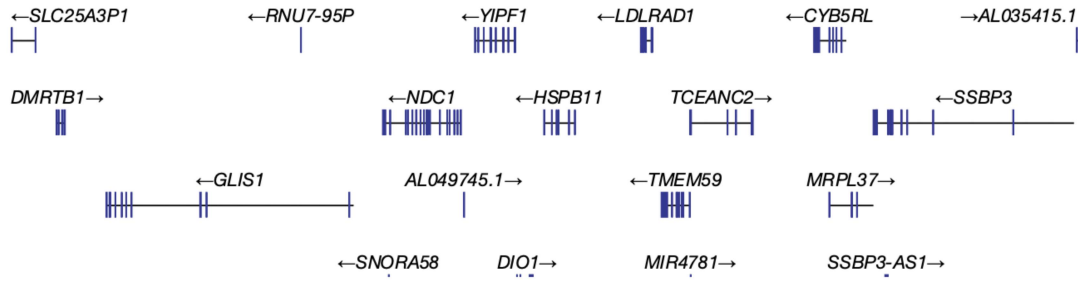

f. Locus 4, rs7587577 and N-acetylasparagine.

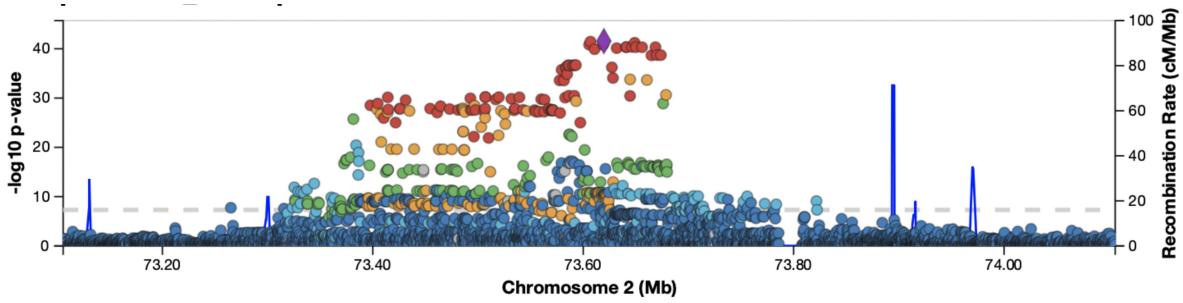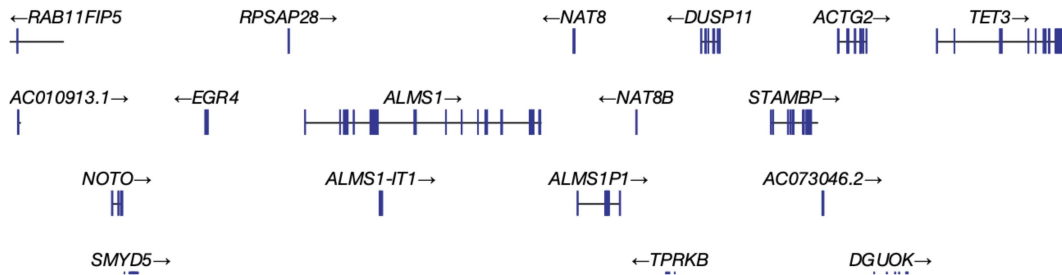

g. Locus 4, rs7587577 and N-acetyl-3-methylhistidine.

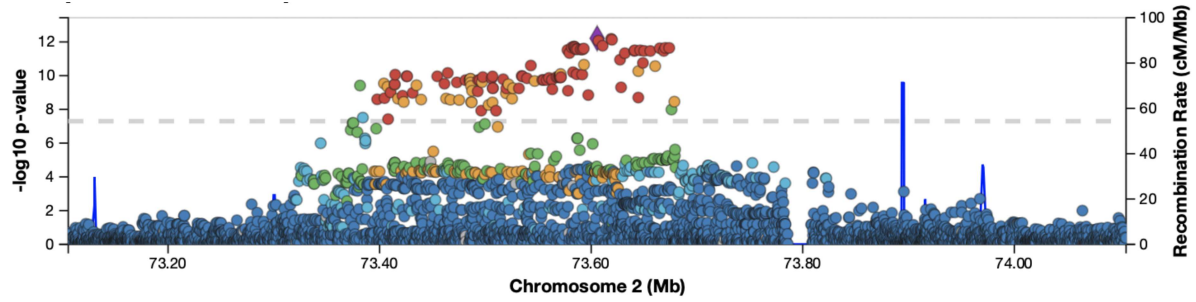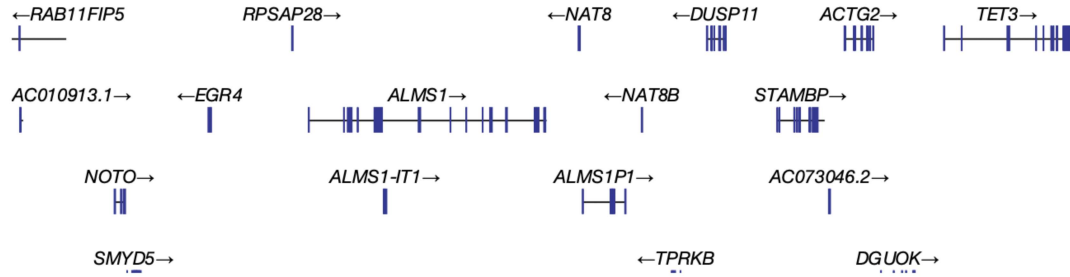

h. Locus 4, rs11126412 and N-acetyl-1-methylhistidine.

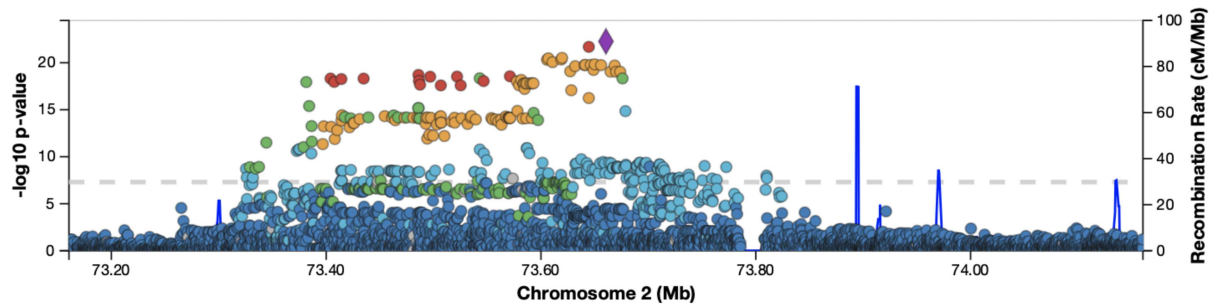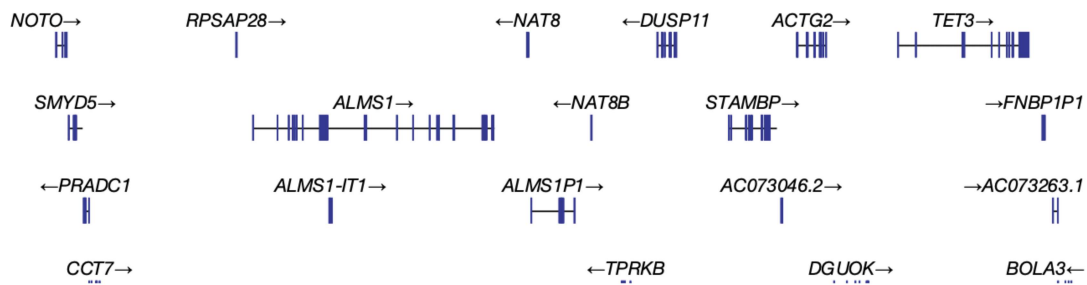

i. Locus 4, rs11126412 and N-acetylphenylalanine.



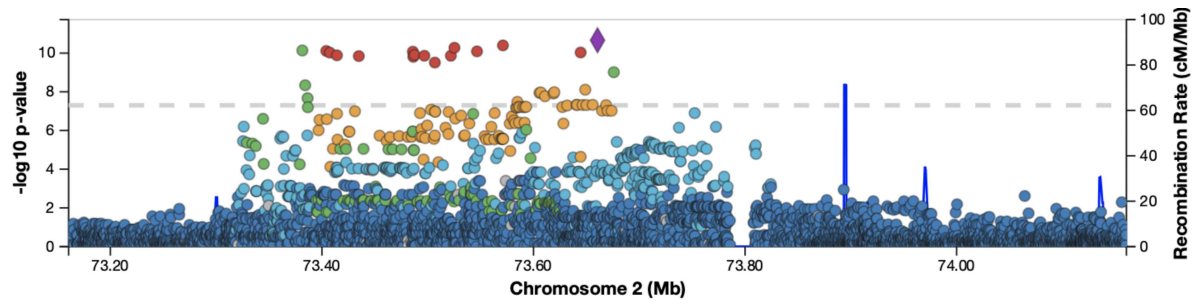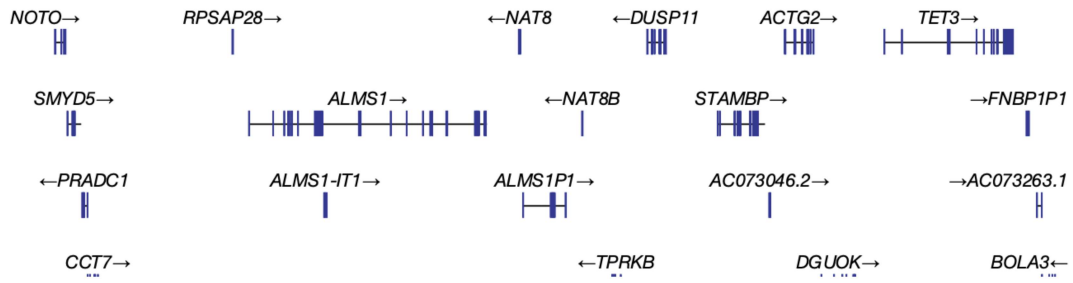

j. Locus 4, rs13431529 and N2-acetyllysine.

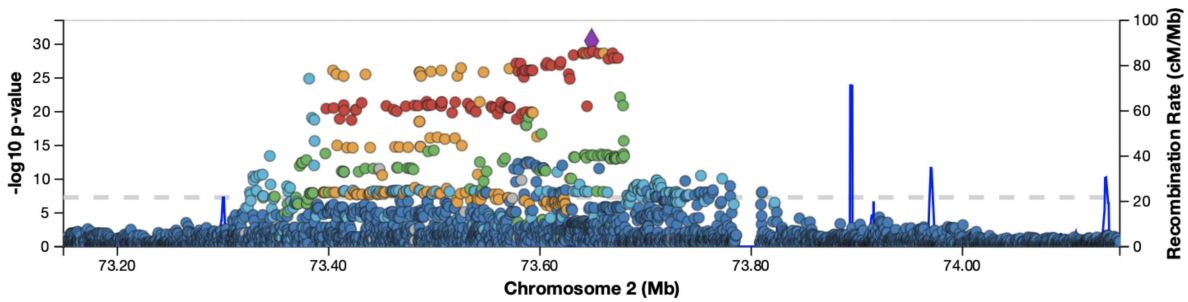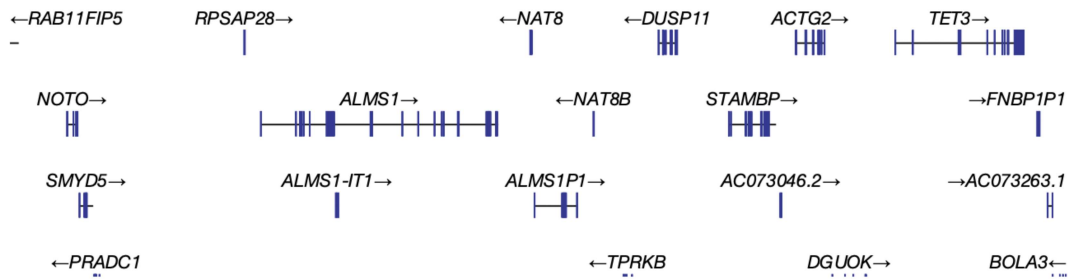

k. Locus 4, rs13409366 and N-acetylcitrulline.

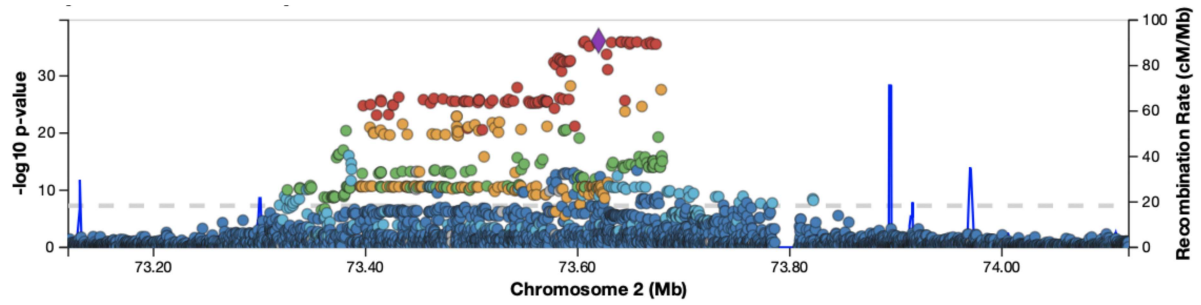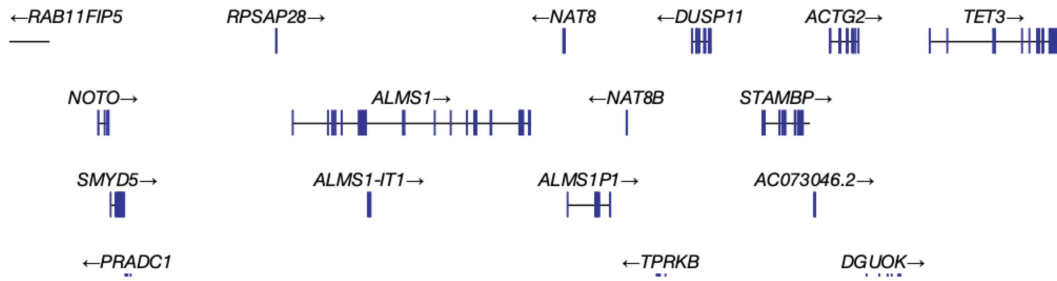

l. Locus 4, rs13409366 and N-acetylglutamine.

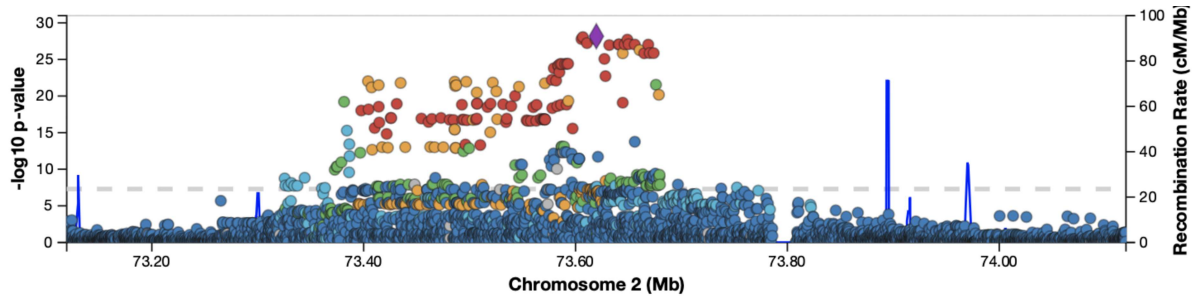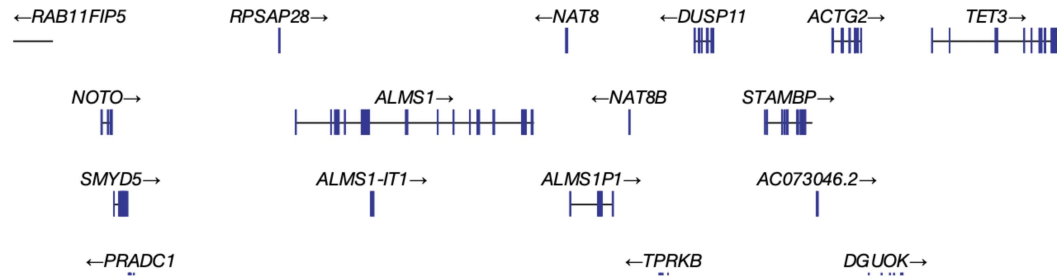

m. Locus 4, rs13409366 and N-acetylkynurenine.

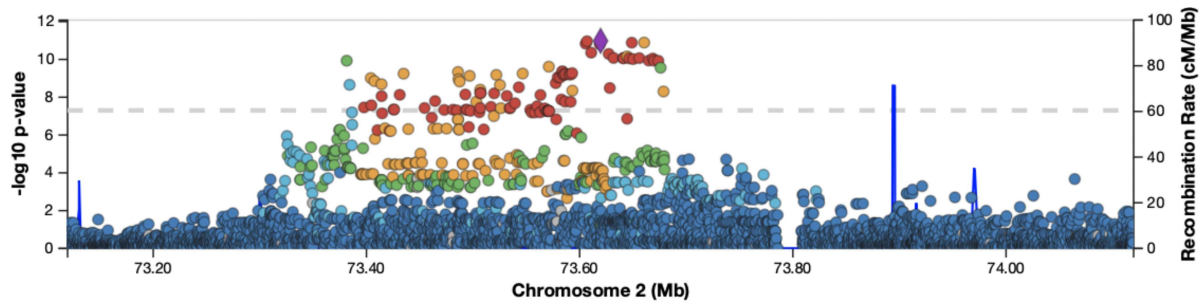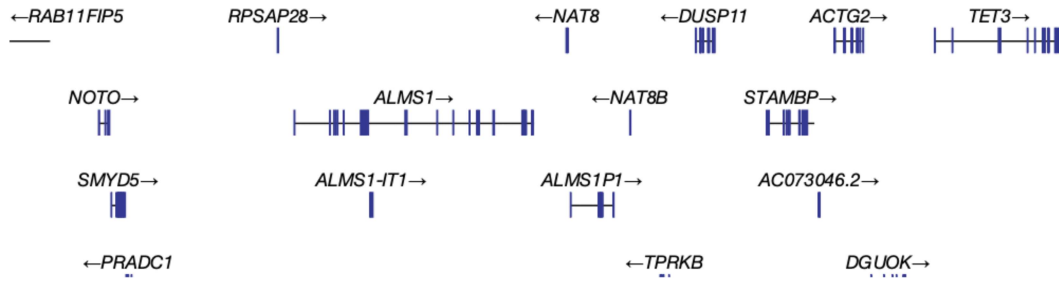

n. Locus 4, rs6546854 and N-acetyllecucine.

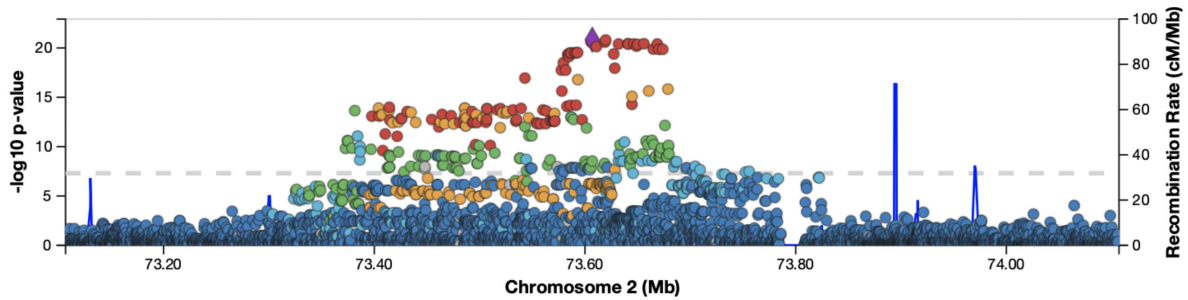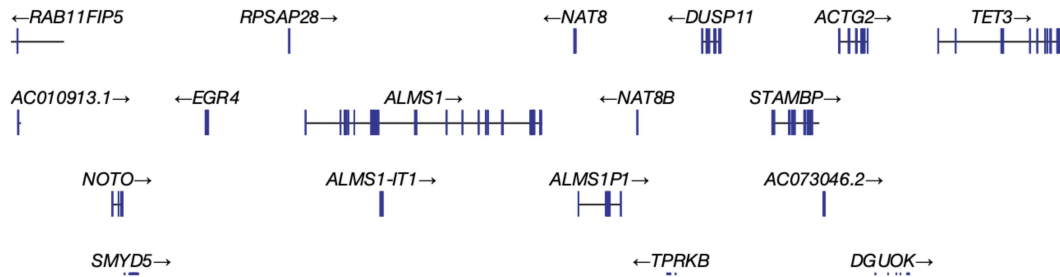

o. Locus 4, rs10168931 and N-acetylarginine.

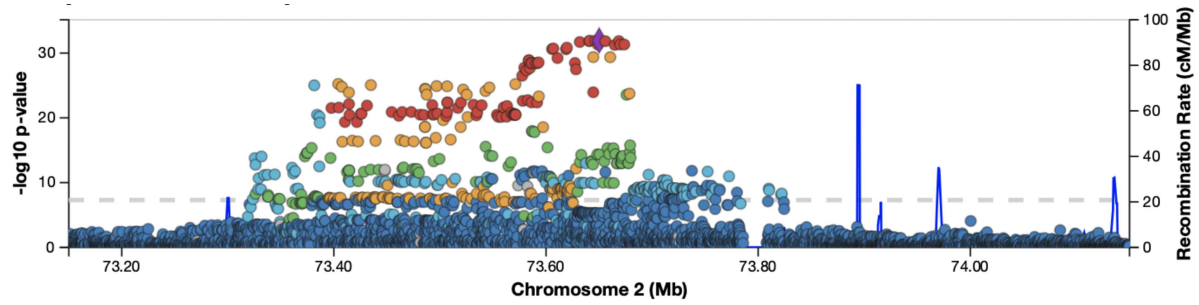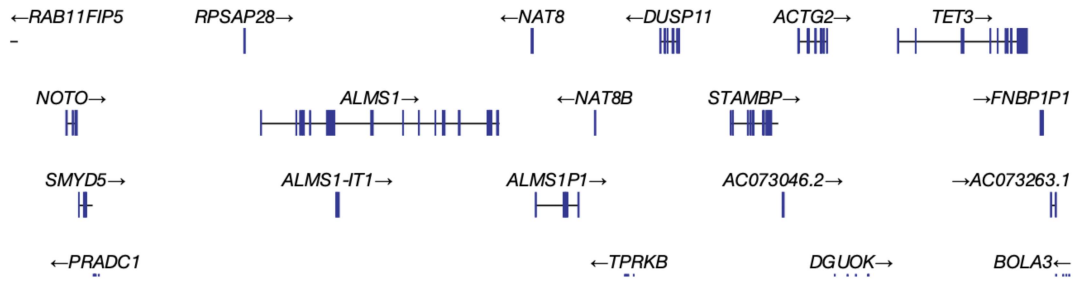

p. Locus 4, rs10206899 and N-delta-acetylornithine.

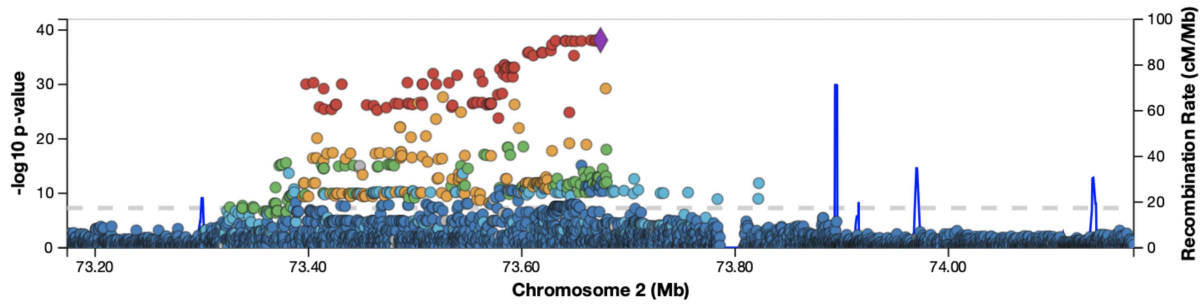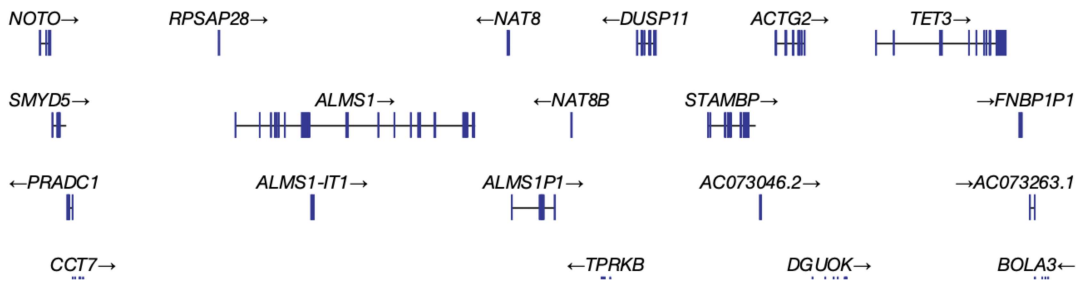

q. Locus 5, rs951389793 and cysteinylglycine.

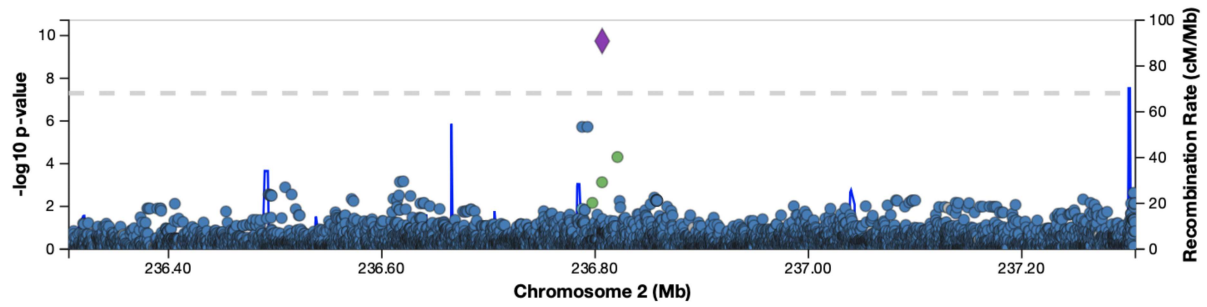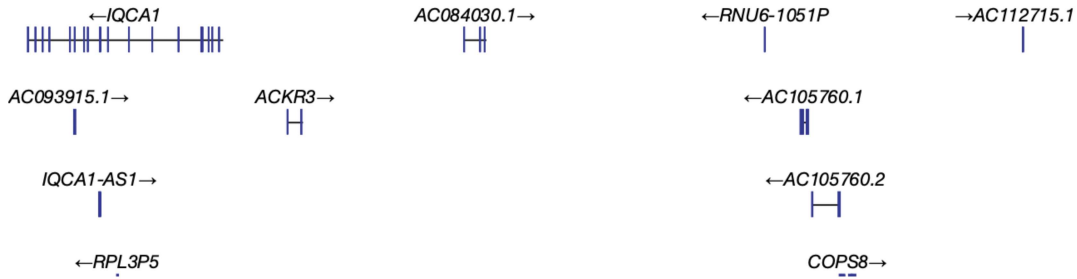

r. Locus 6, rs1976391 and biliverdin.

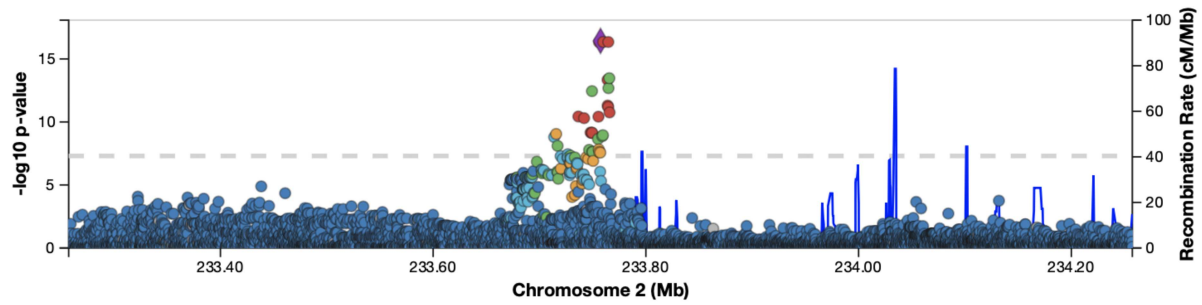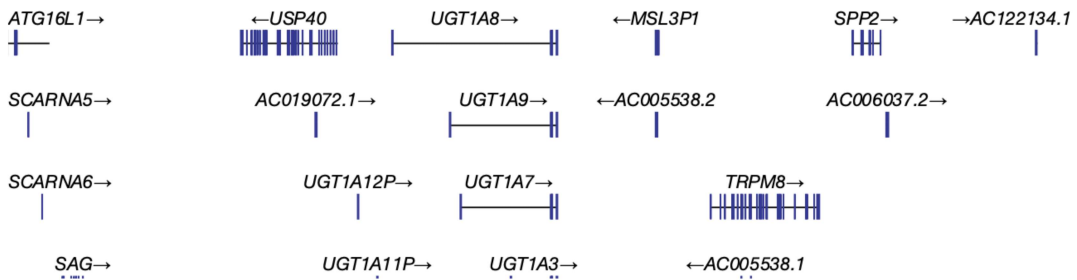

s. Locus 6, rs4148325 and bilirubin (E,E).

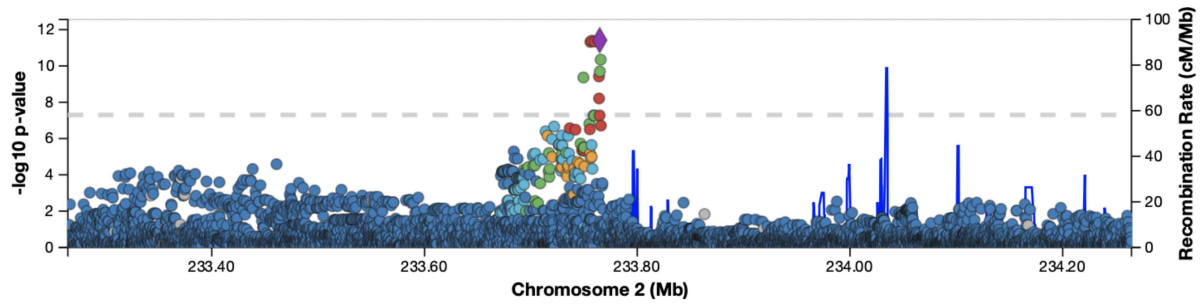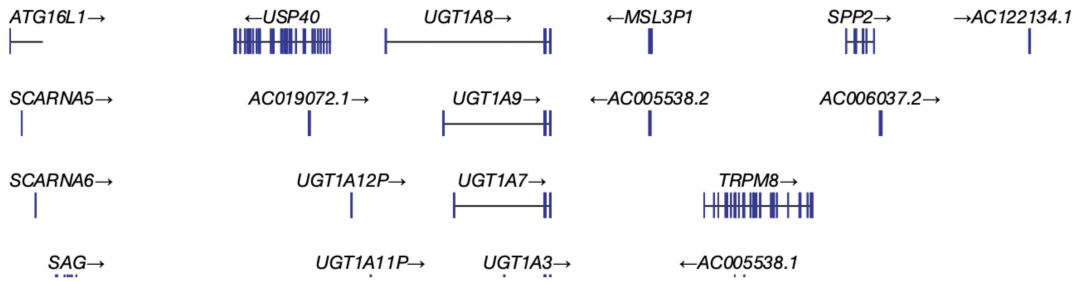

t. Locus 7, rs62184450 and cysteinylglycine.

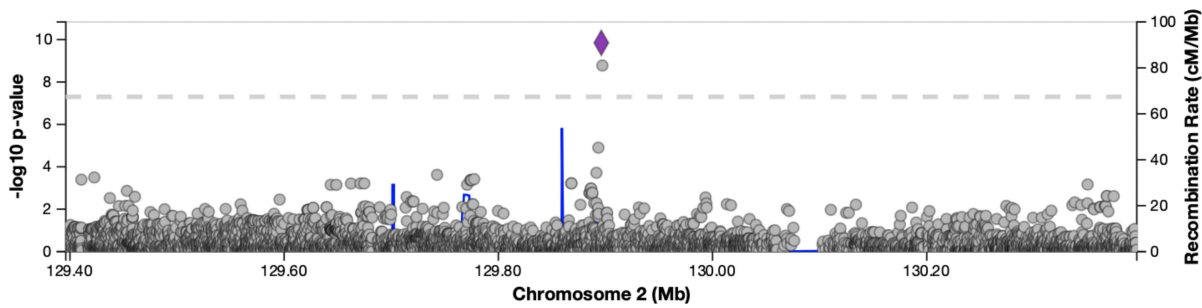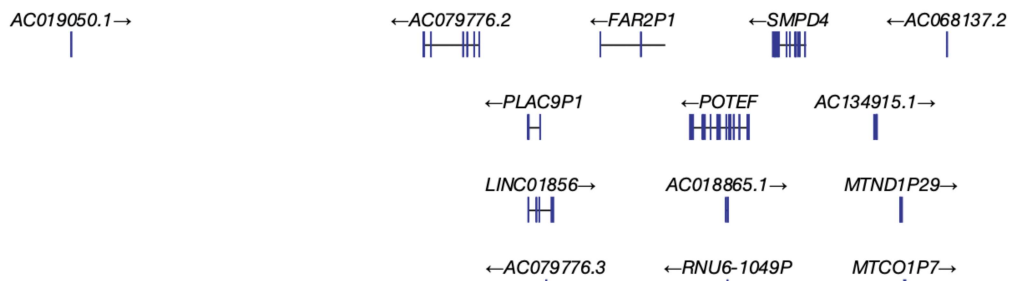

u. Locus 8, rs73835707 and N-acetylmethionine.

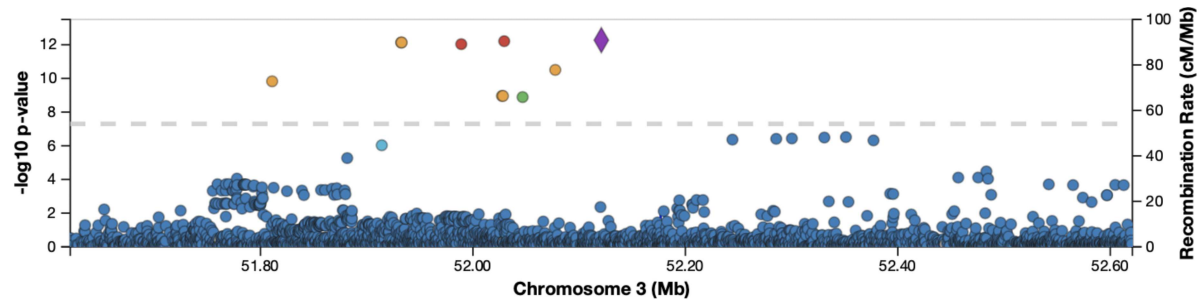

v. Locus 8, rs73835707 and N-acetylmethionine sulfoxide.

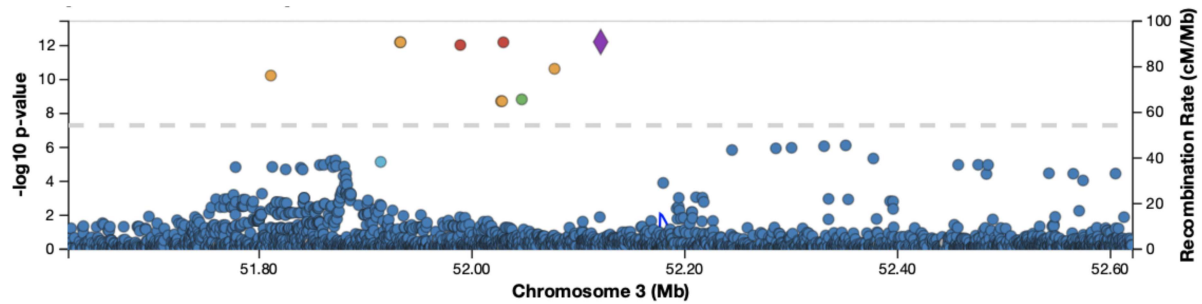

w. Locus 8, rs2229152 and N-acetylanaline.

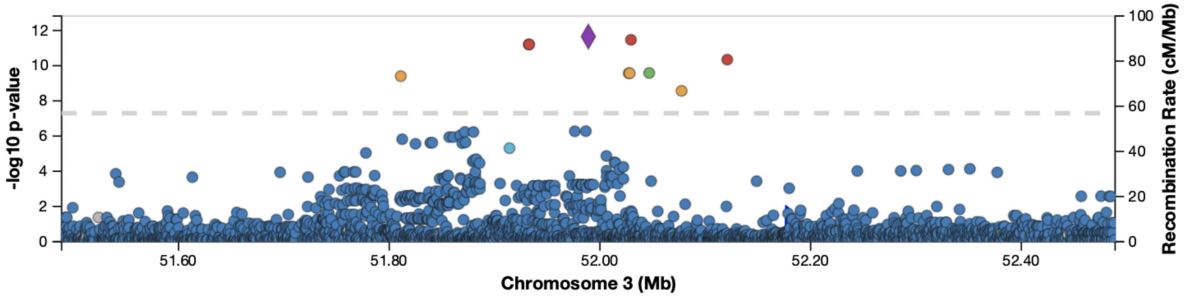

x. Locus 9, rs1973612 and histidylalanine.

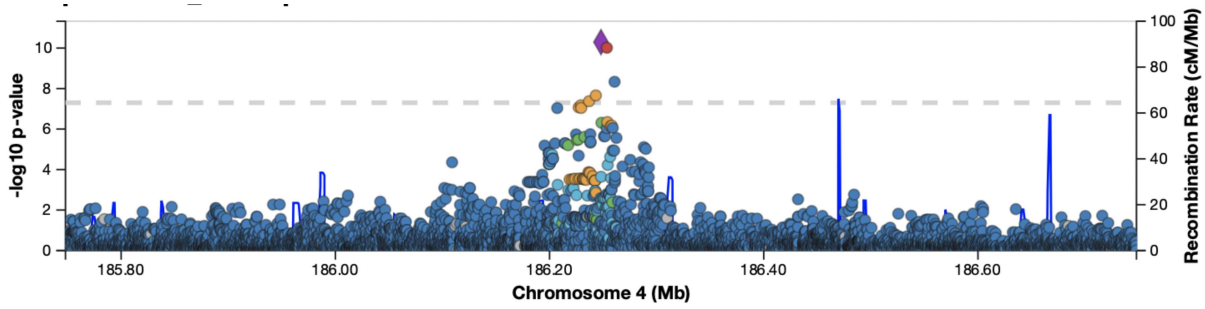

y. Locus 10, rs344514 and 3-aminoisobutyrate.



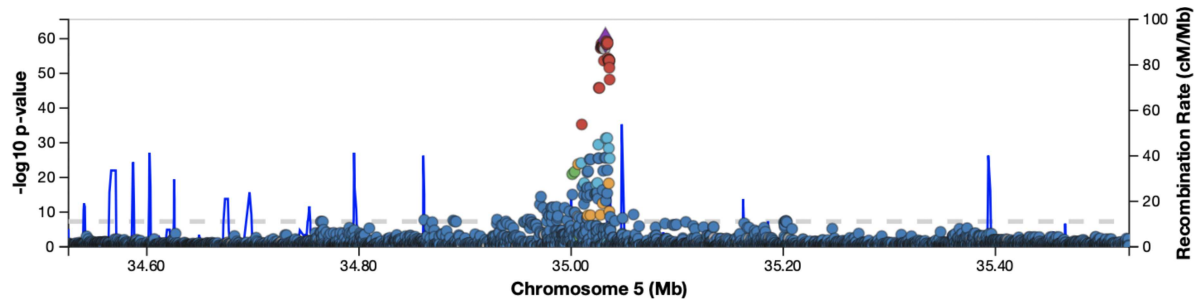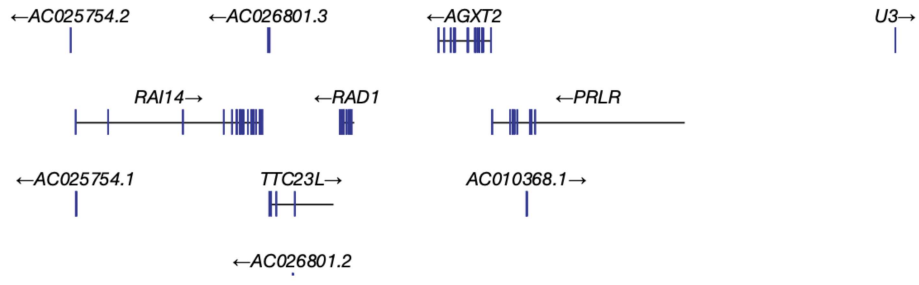

z. Locus 11, rs60132035 and sphingomyelin (d18:1/20:1, d18:2/20:0).

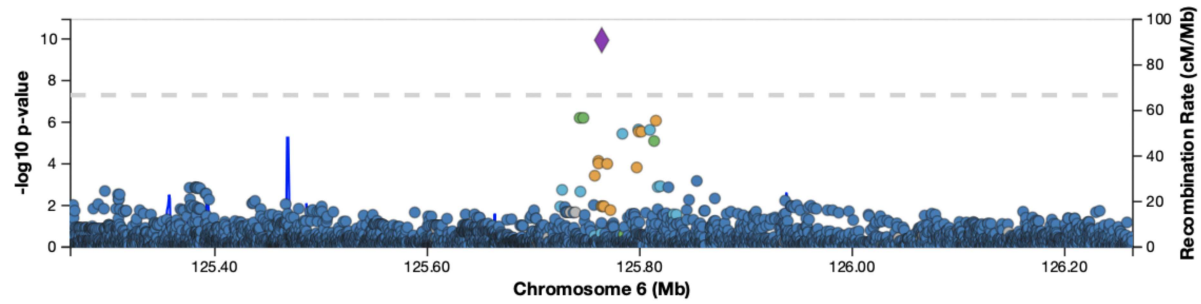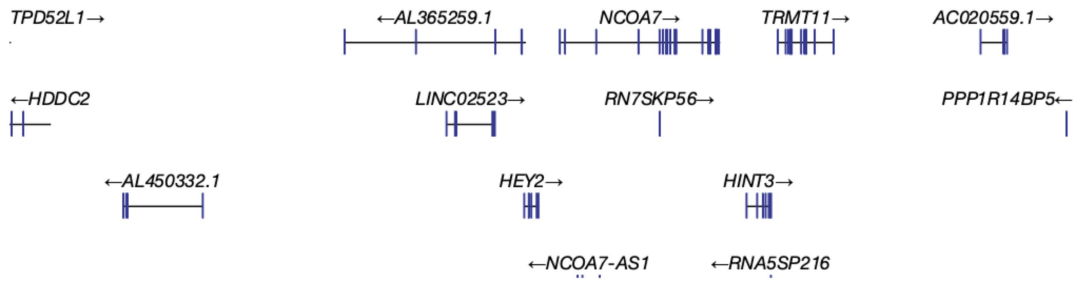

aa. Locus 12, rs7780766 and N-acetylhistidine.

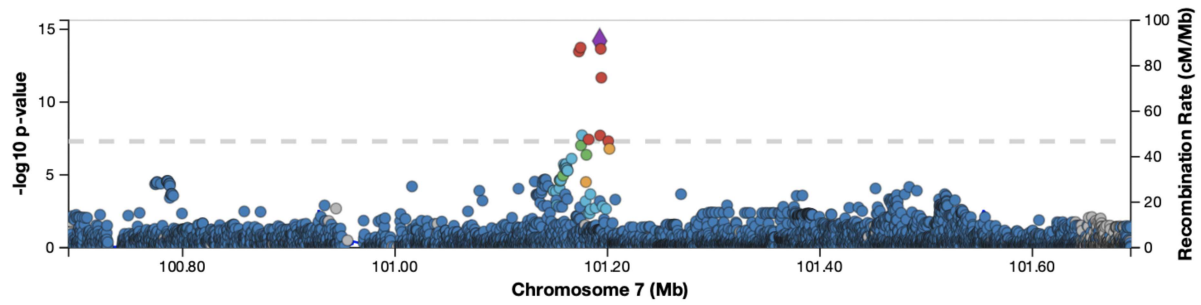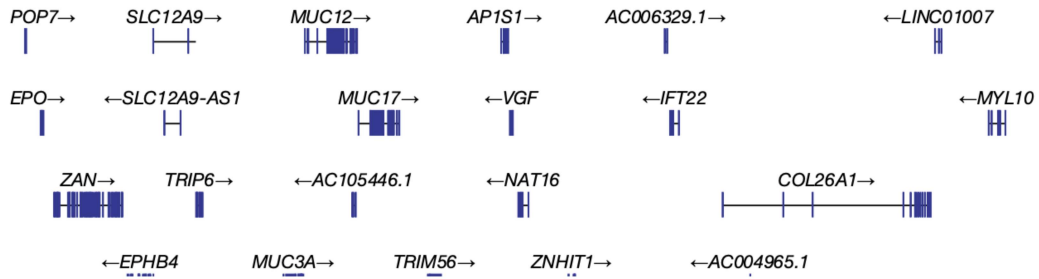

bb. Locus 13, rs139981949 and glycohyocholate.

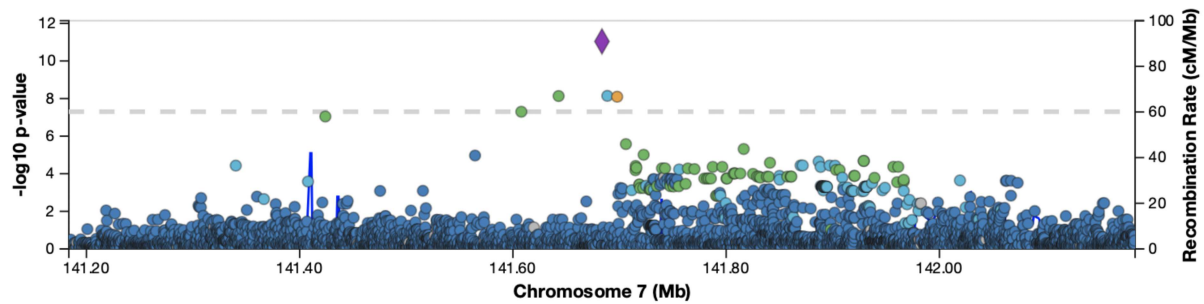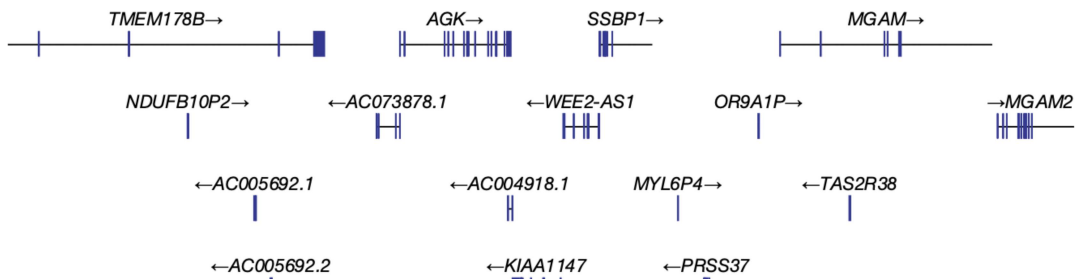

cc. Locus 14, rs76541360 and 1-arachidonoyl-GPI (20:4).

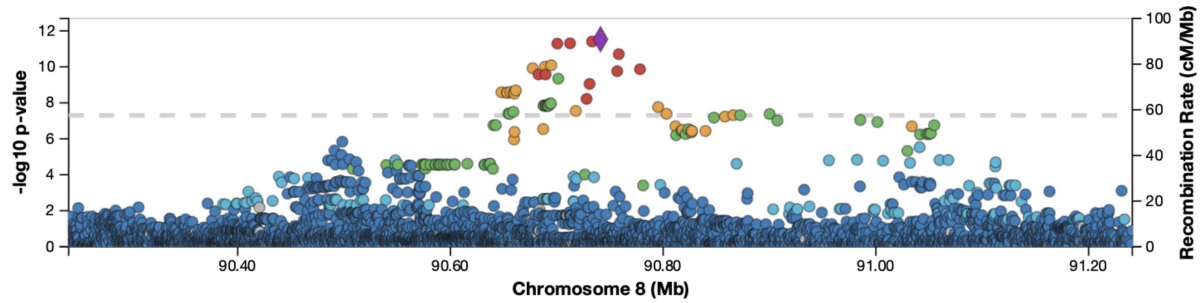

dd. Locus 15, rs59095288 and 6-oxopiperidine-2-carboxylate.

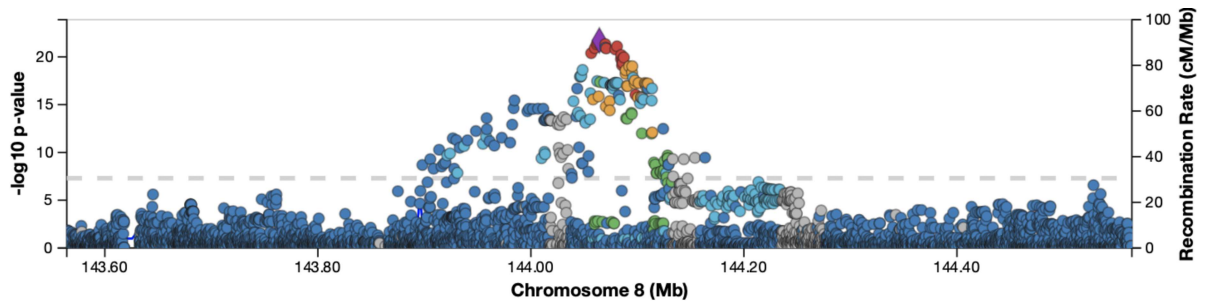

ee. Locus 16, rs55758160 and 2'-O-methyluridine.

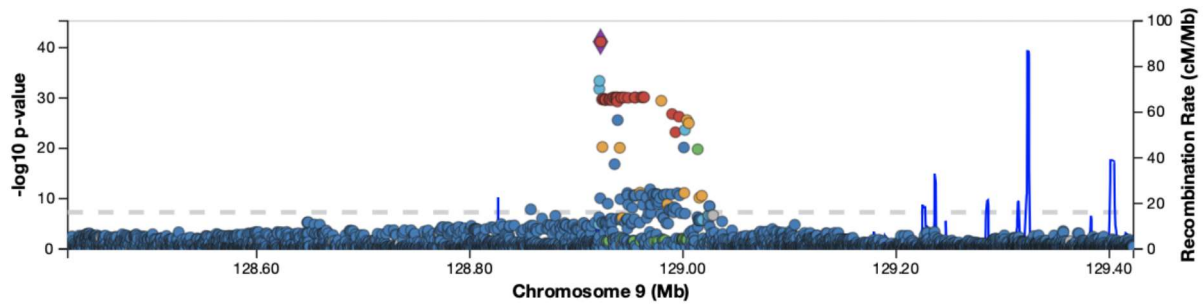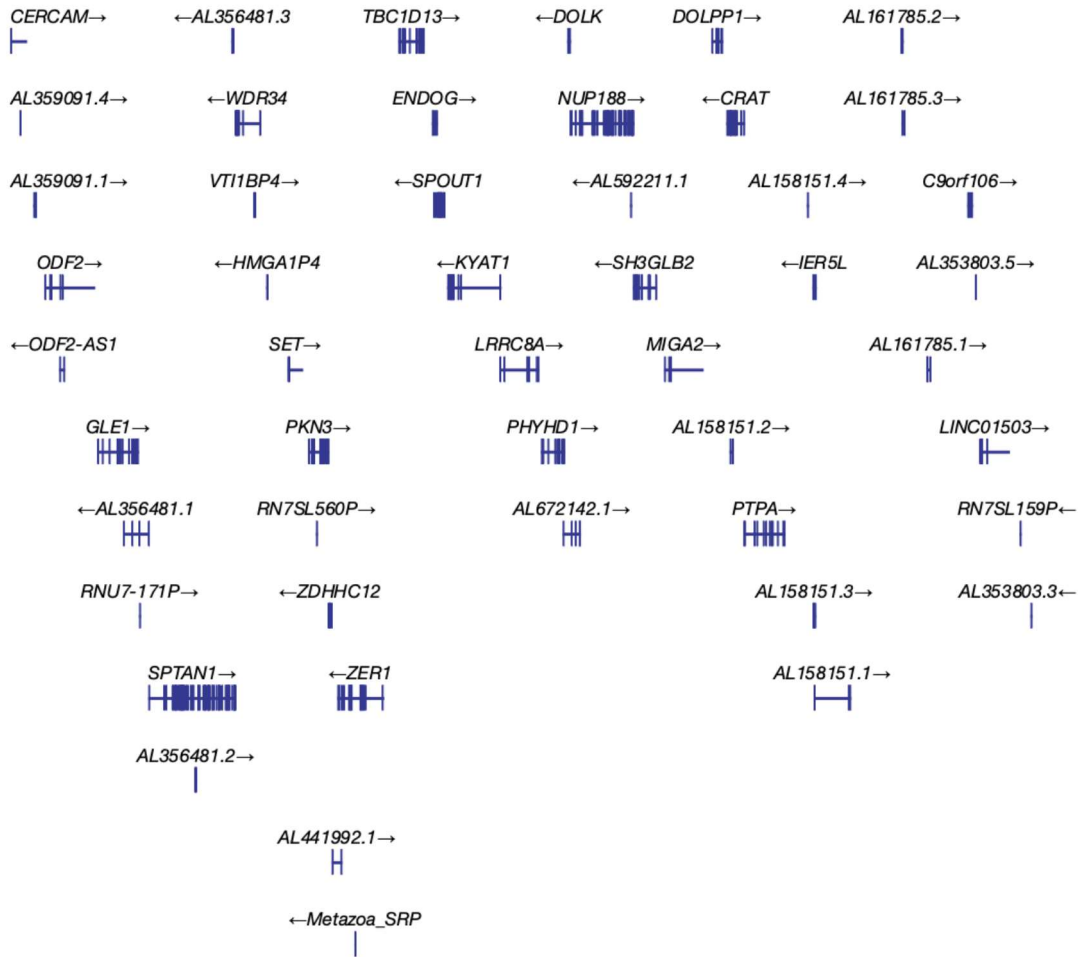

ff. Locus 16, rs57294583 and 2'-O-methylcytidine.

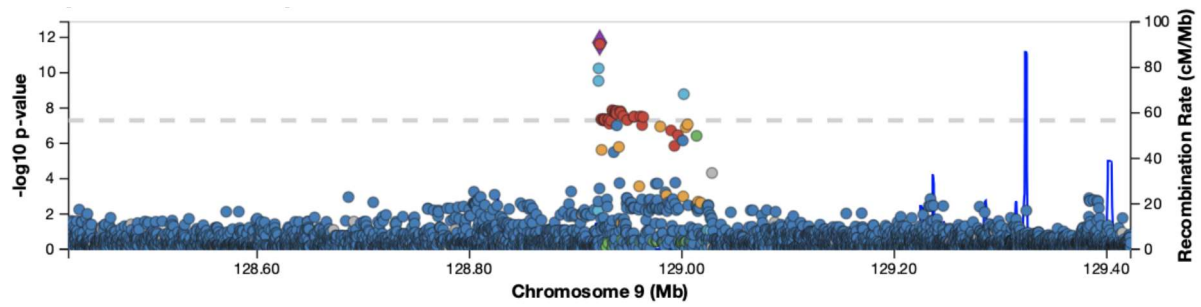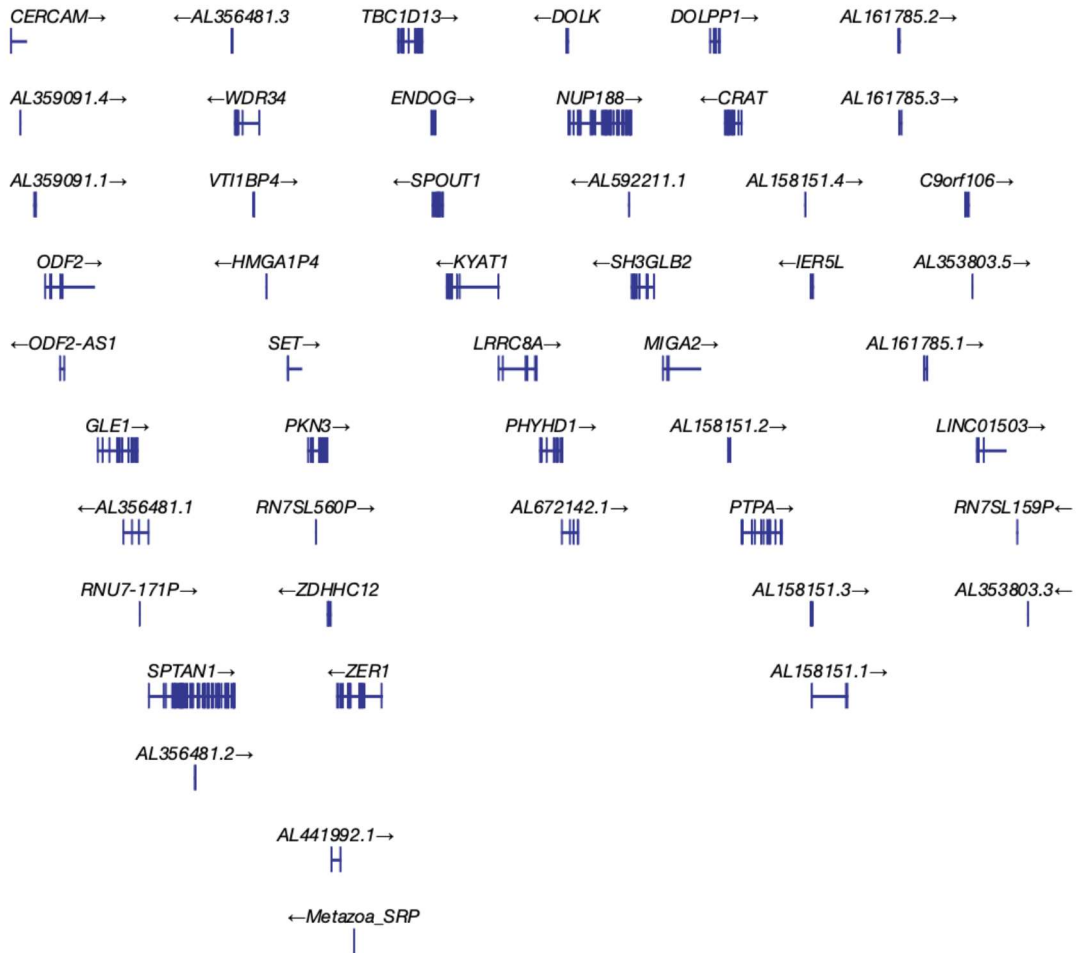

gg. Locus 17, rs142514677 and N-acetyl-aspartyl-glutamate (NAAG).

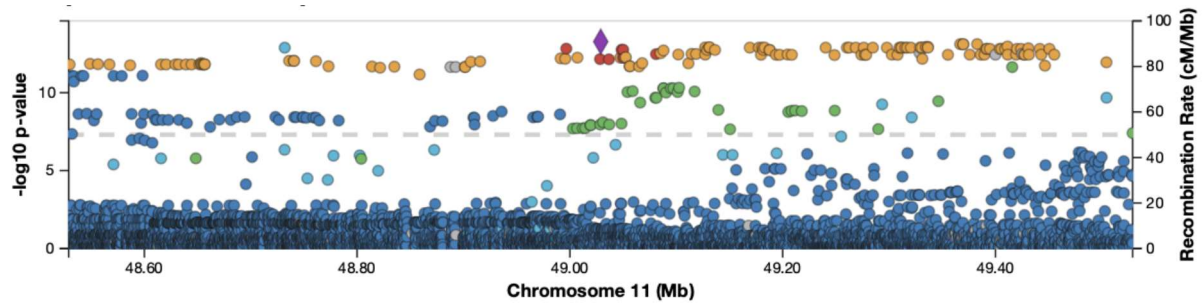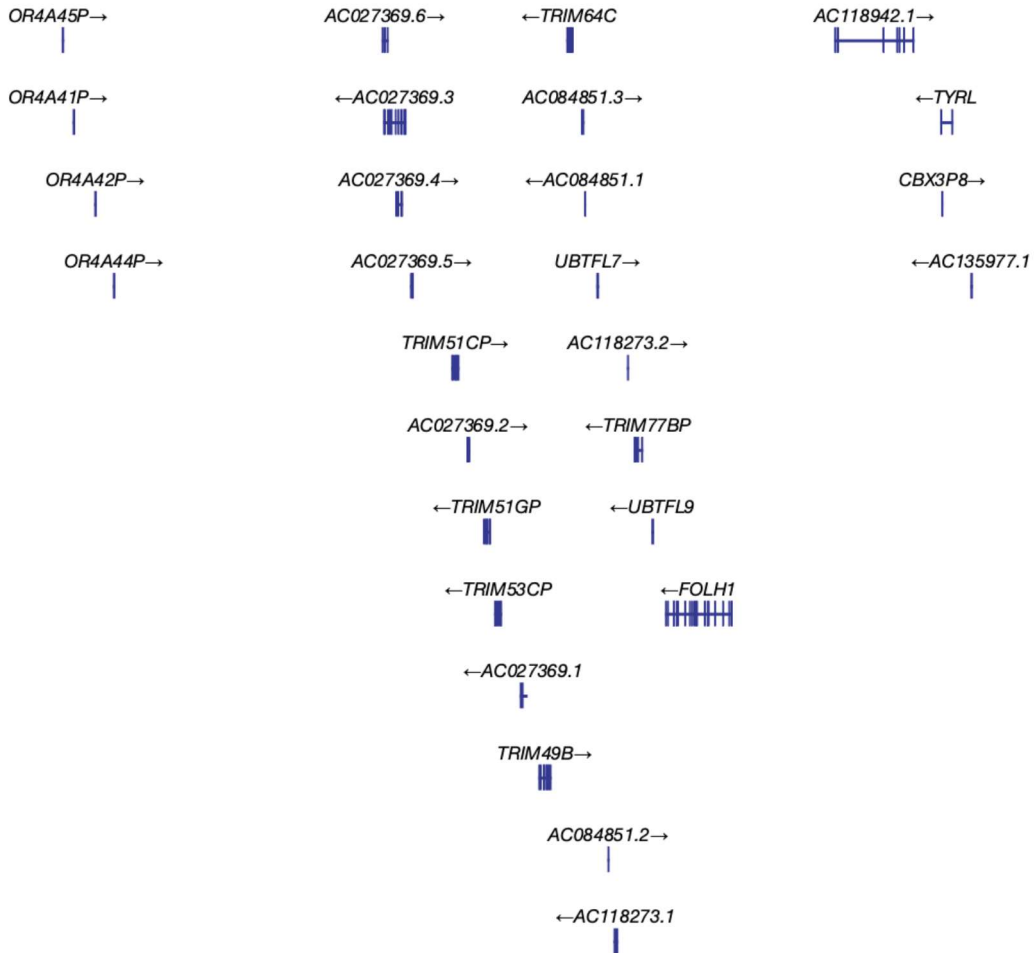

hh. Locus 18, rs150556827 and N-acetyl-aspartyl-glutamate (NAAG).

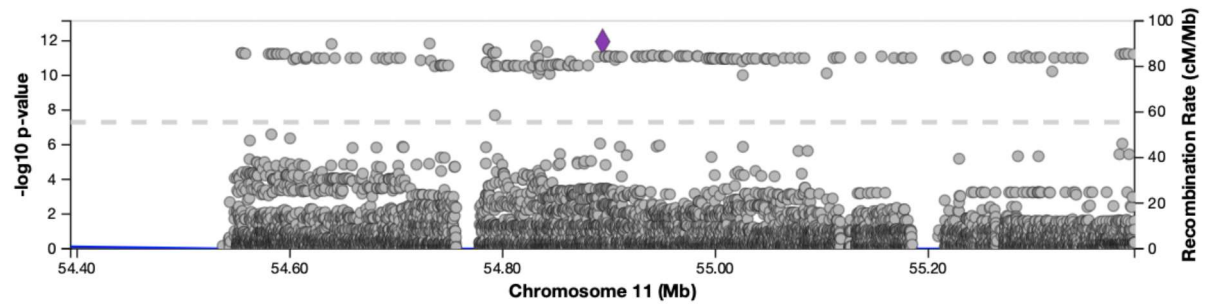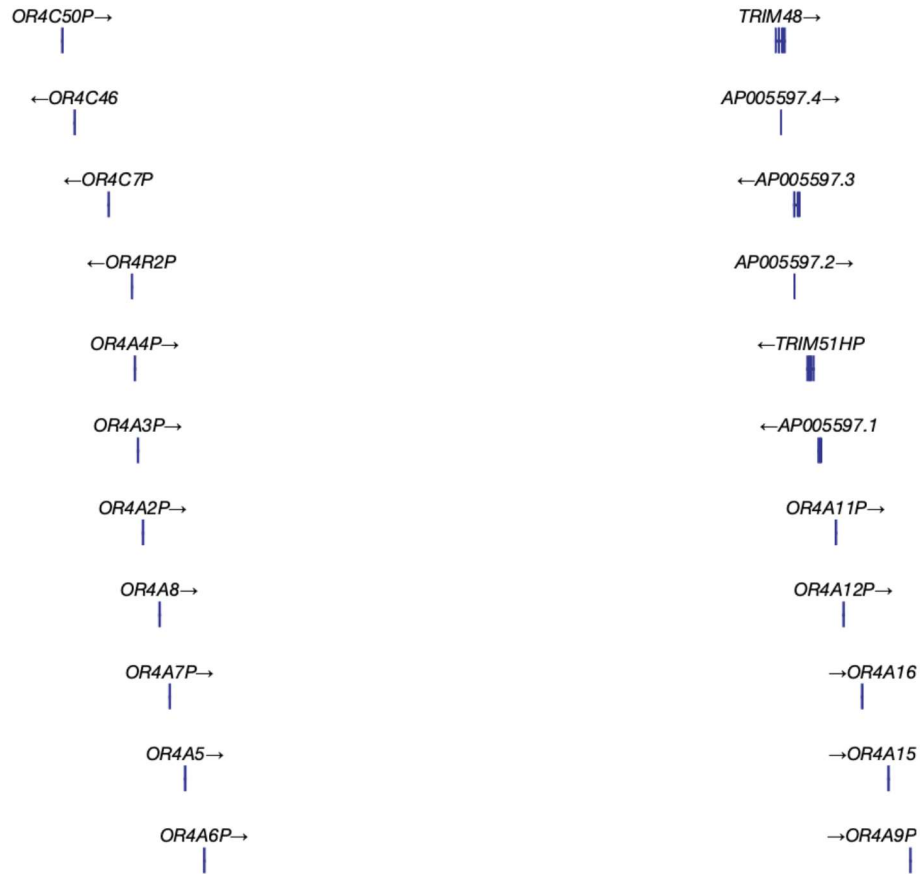

ii. Locus 19, rs174564 and 1-arachidonoyl-GPC (20:4n6).

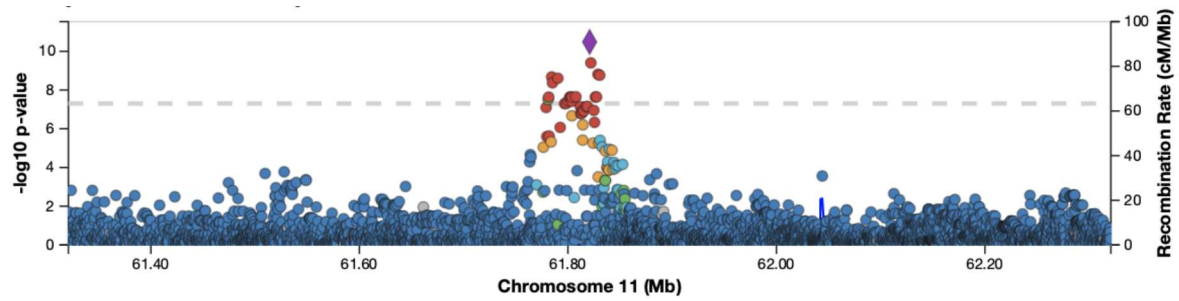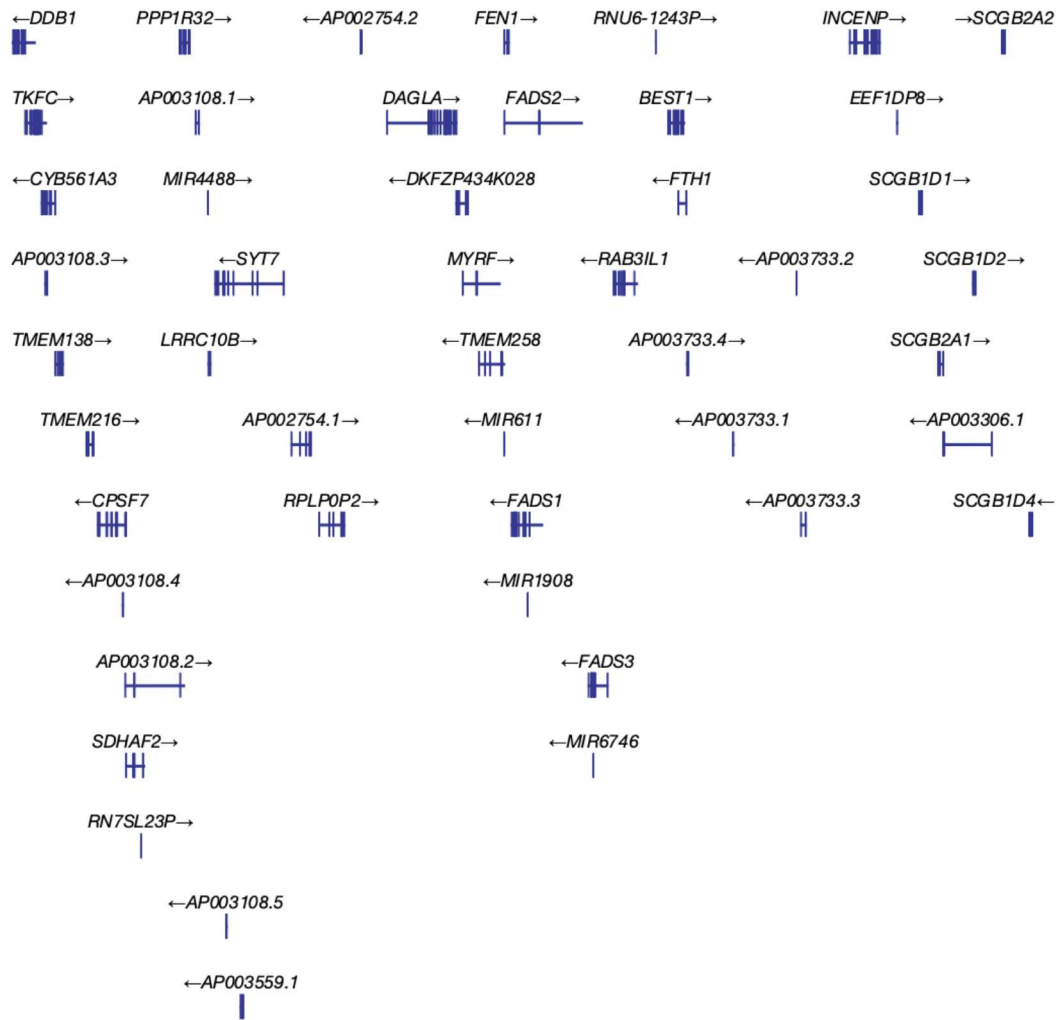

jj. Locus 20, rs115780269 and N-acetyltryptophan.



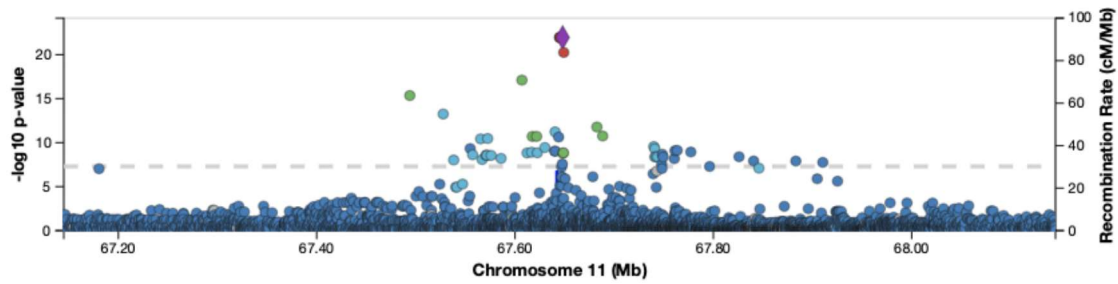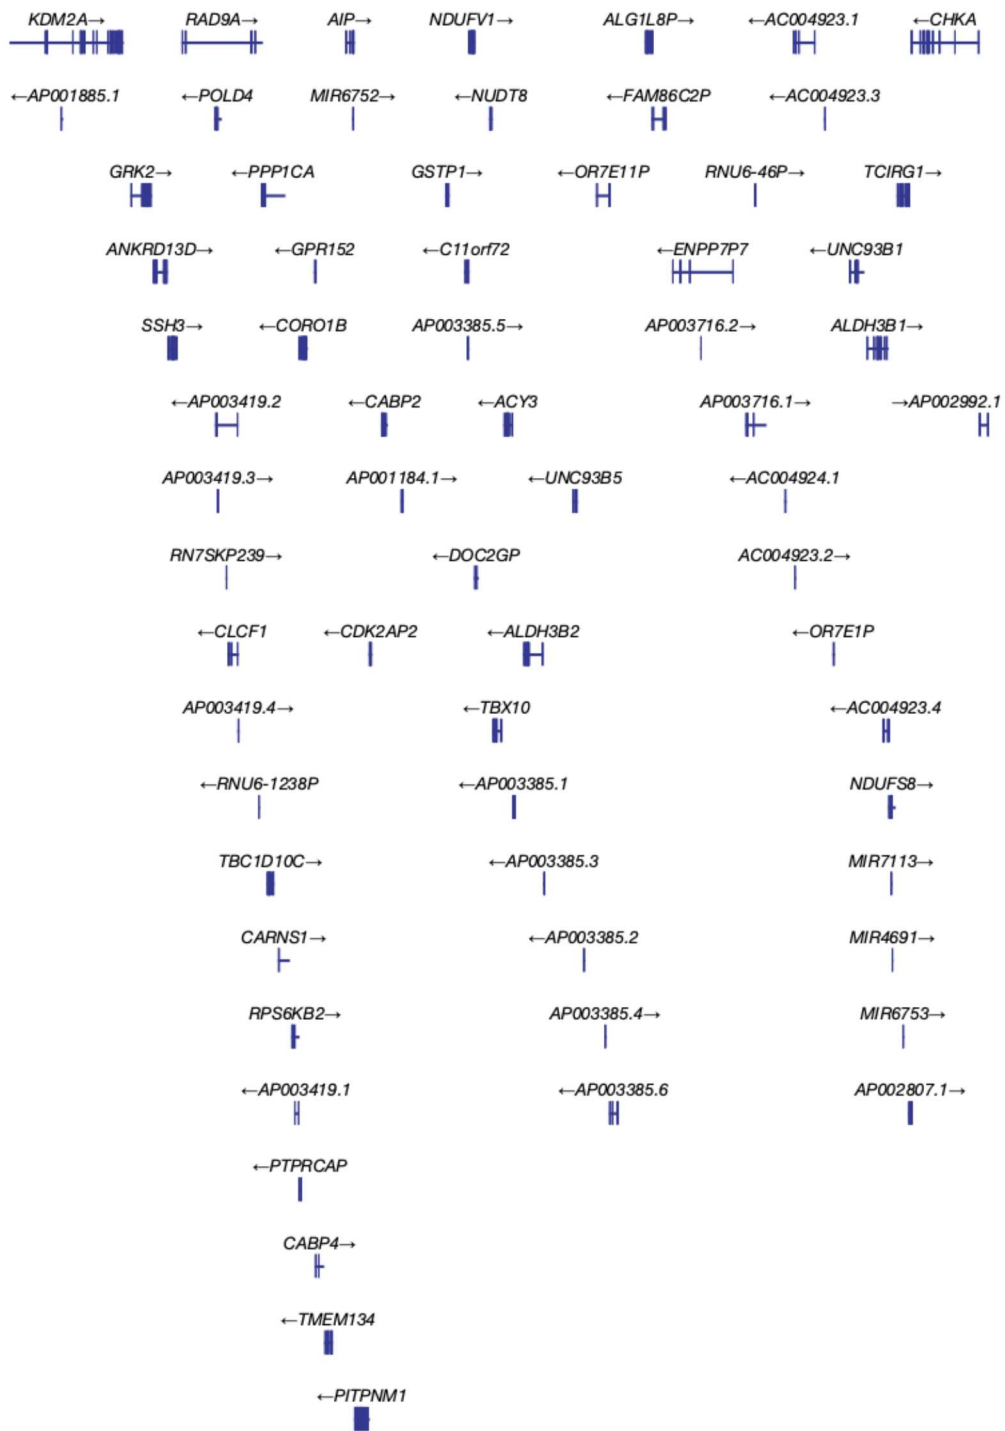

kk. Locus 20, rs115780269 and N-acetylkynurenine.

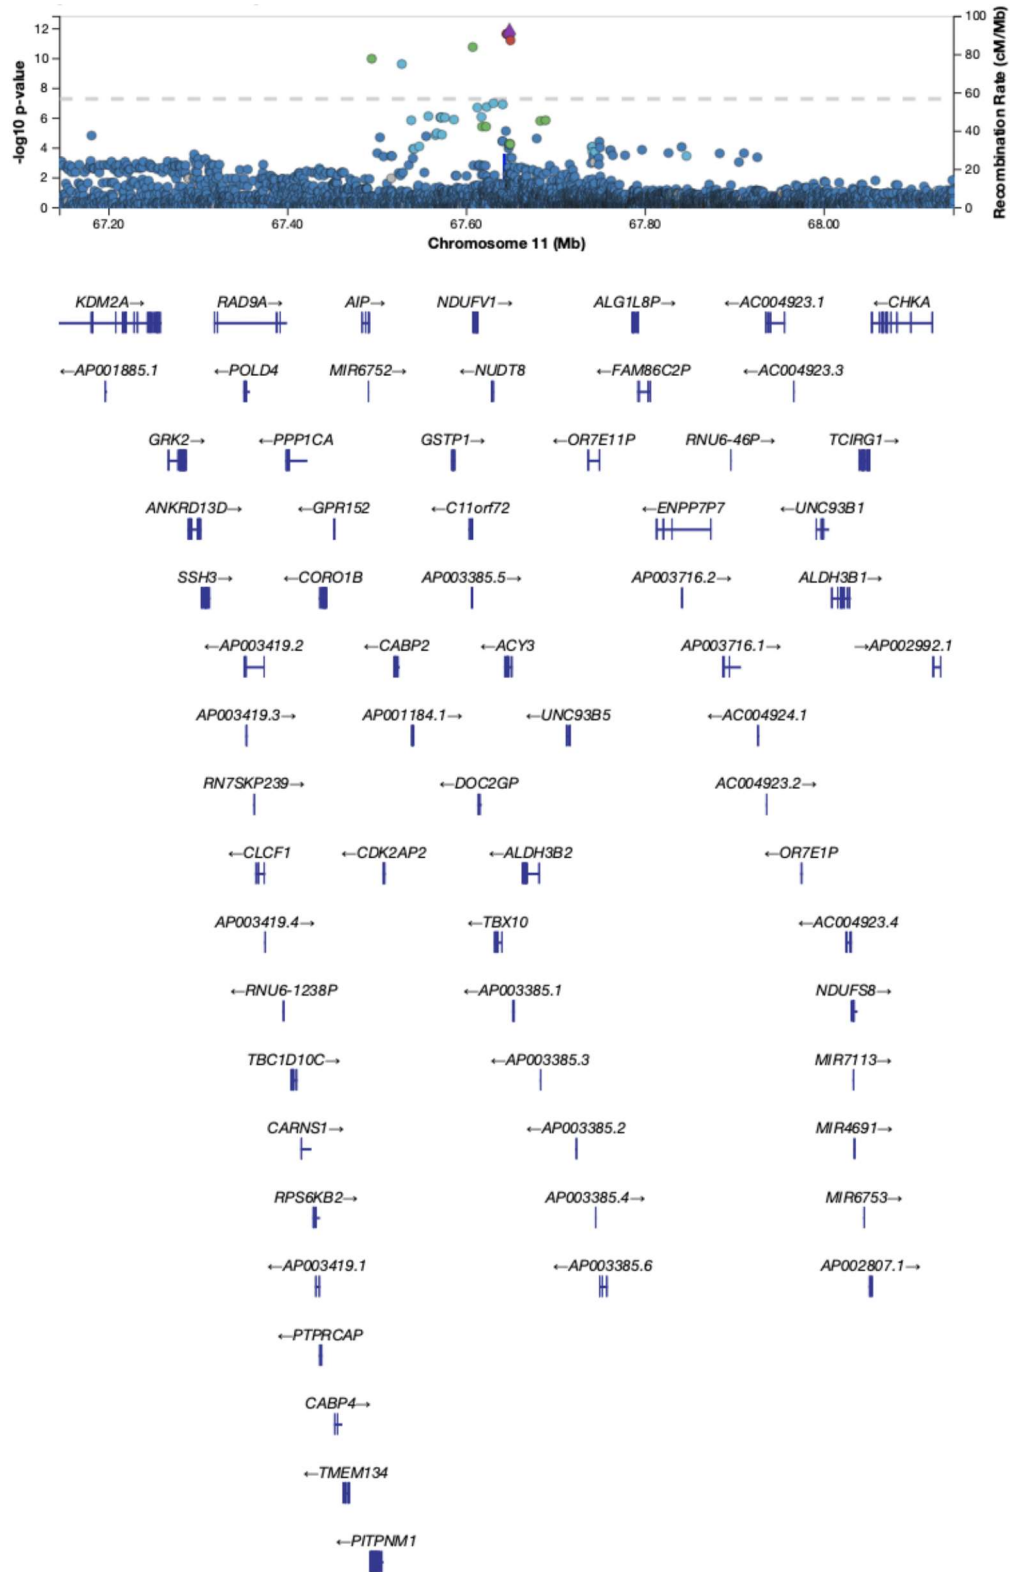

II. Locus 20, rs115780269 and N-acetyltyrosine.

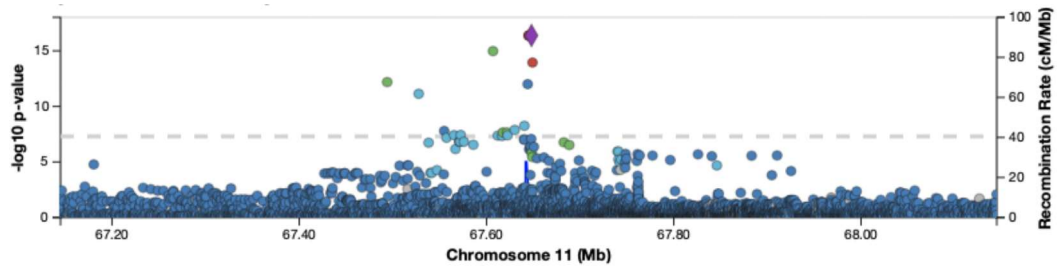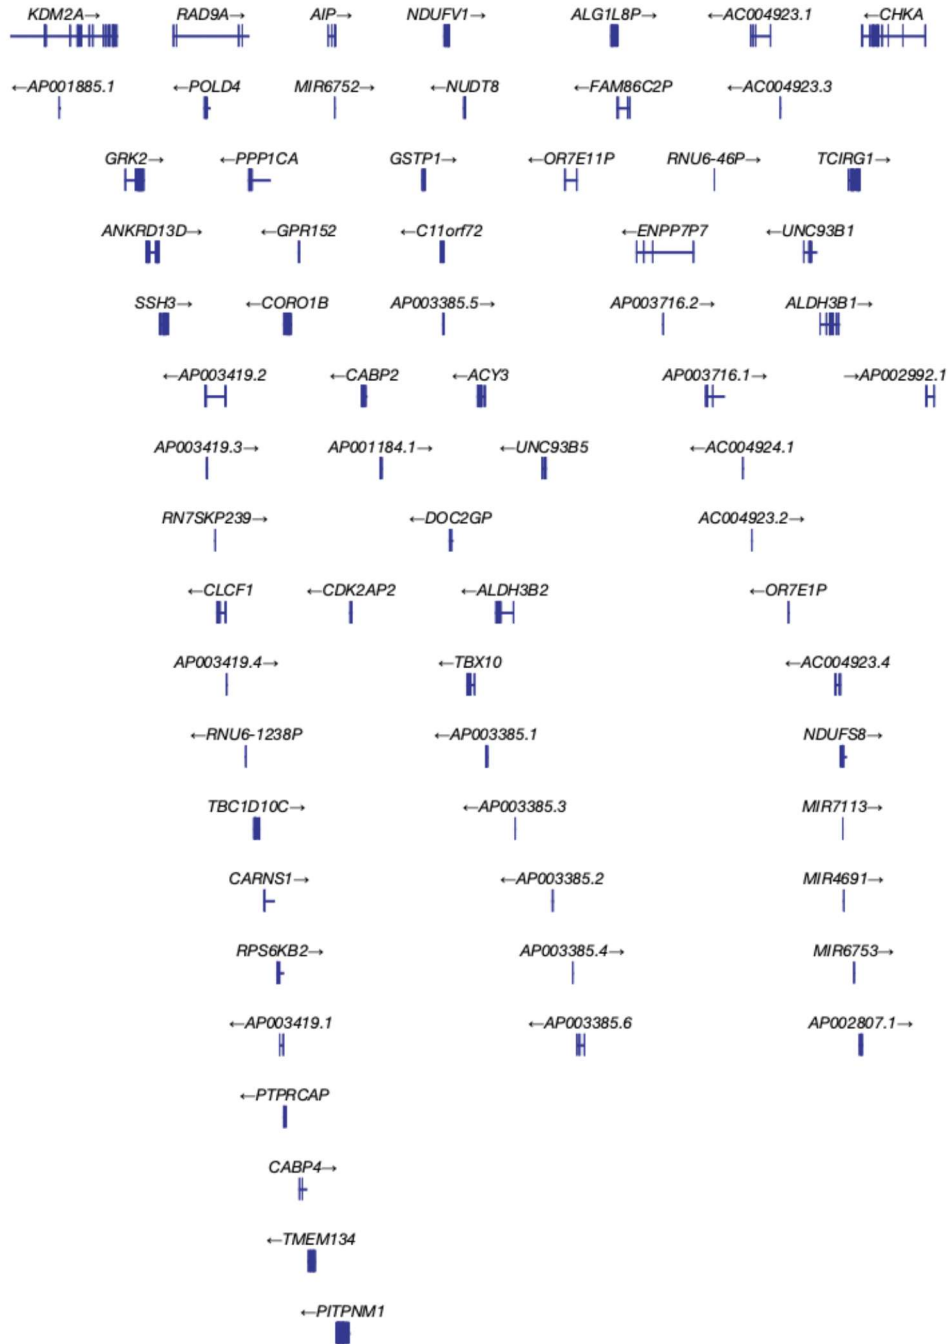

mm. Locus 20, rs115780269 and N-acetylphenylalanine.

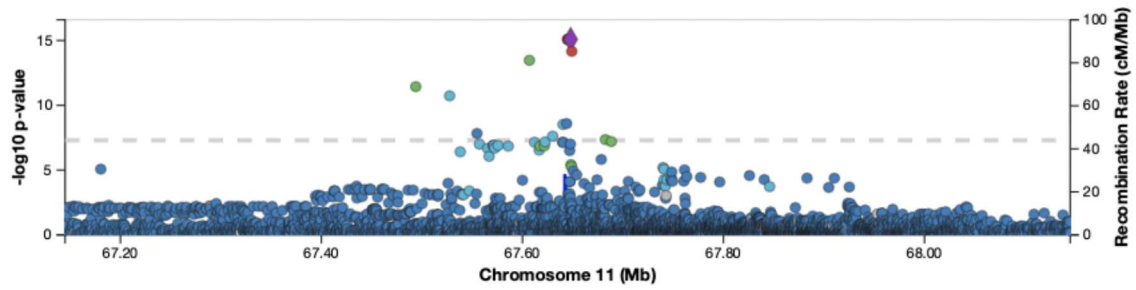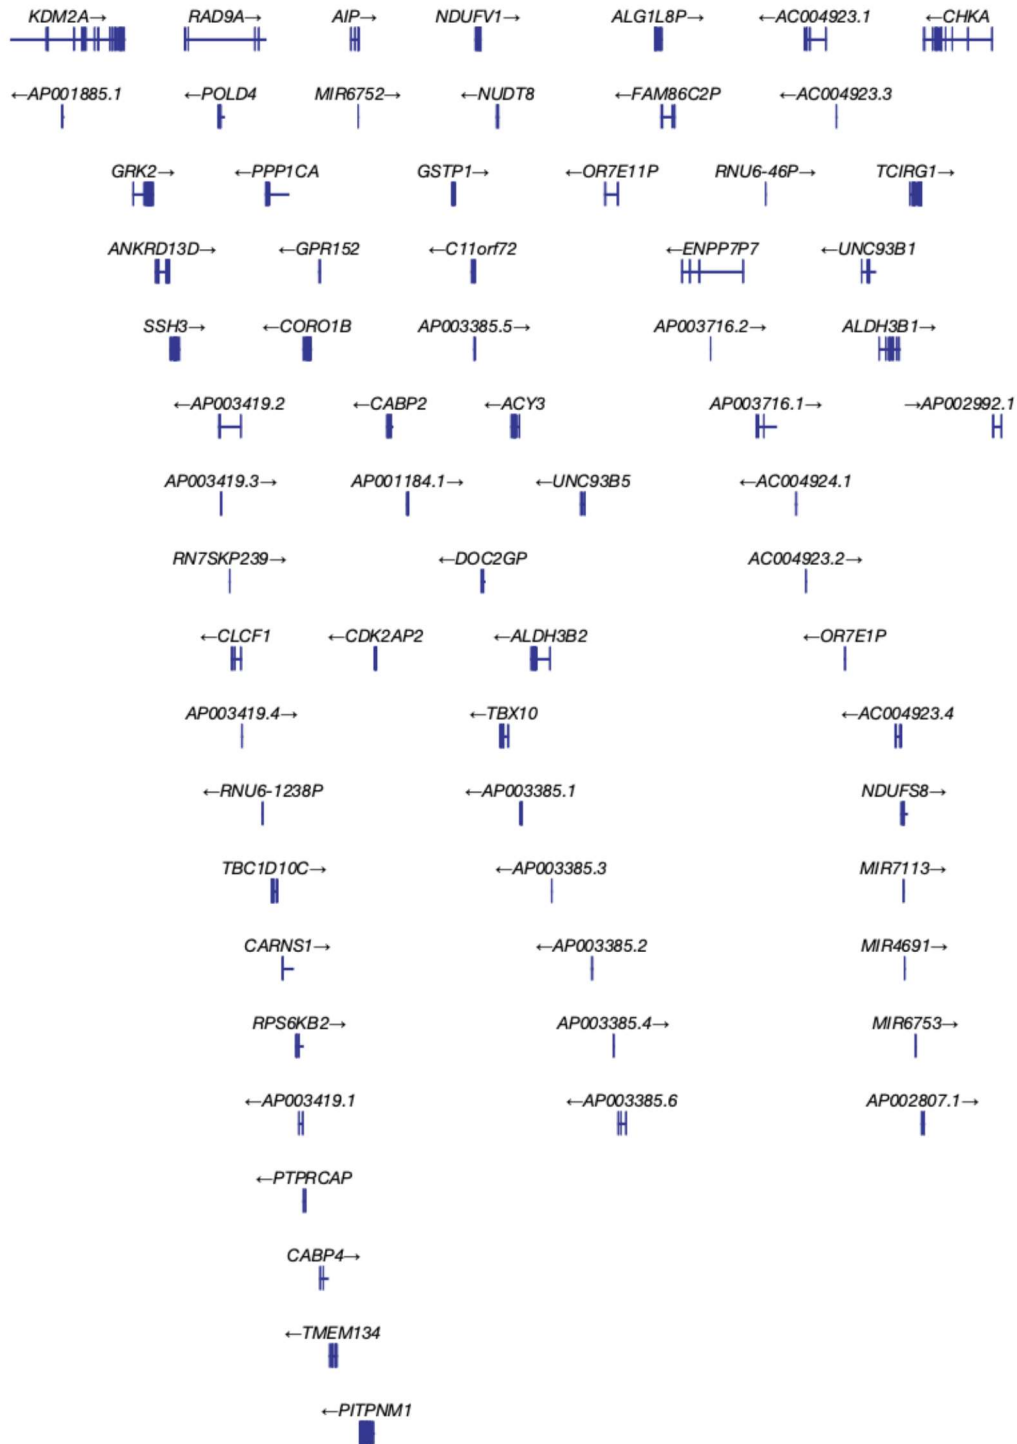

nn. Locus 21, rs114419265 and glycochenodeoxycholate glucuronide.

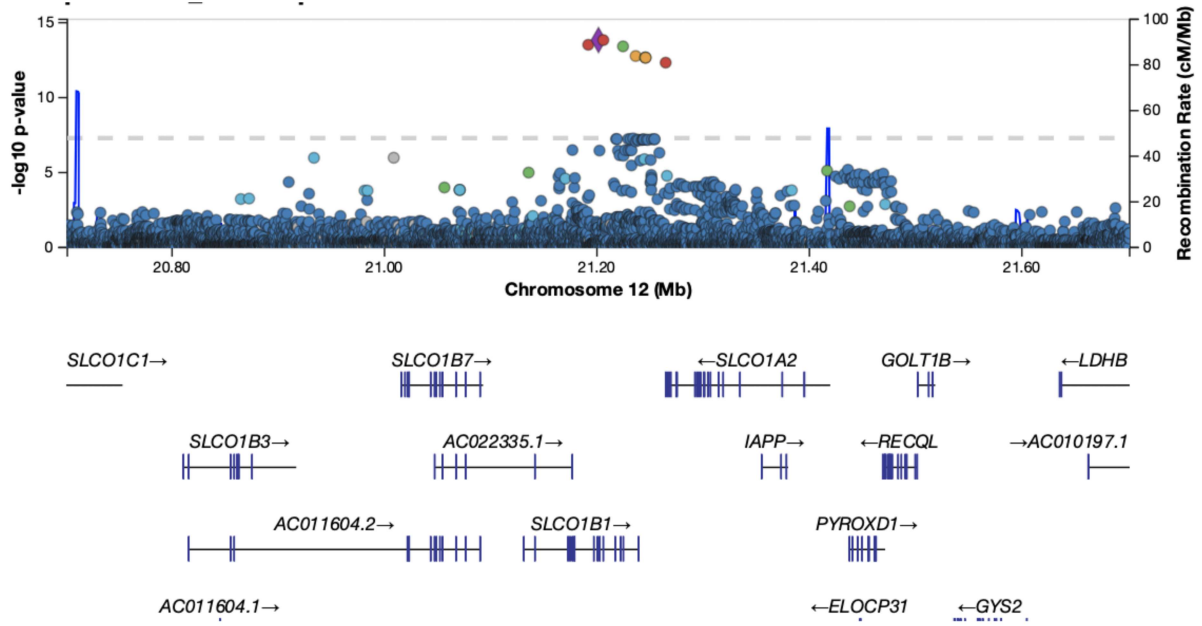

oo. Locus 22, rs34708625 and ethylmalonate.

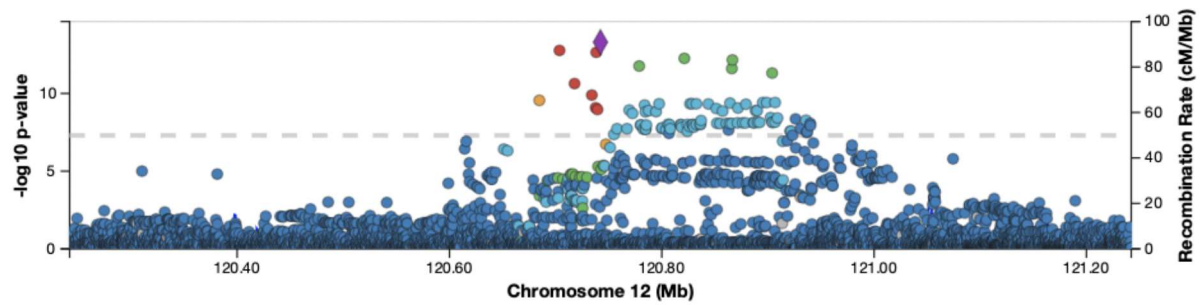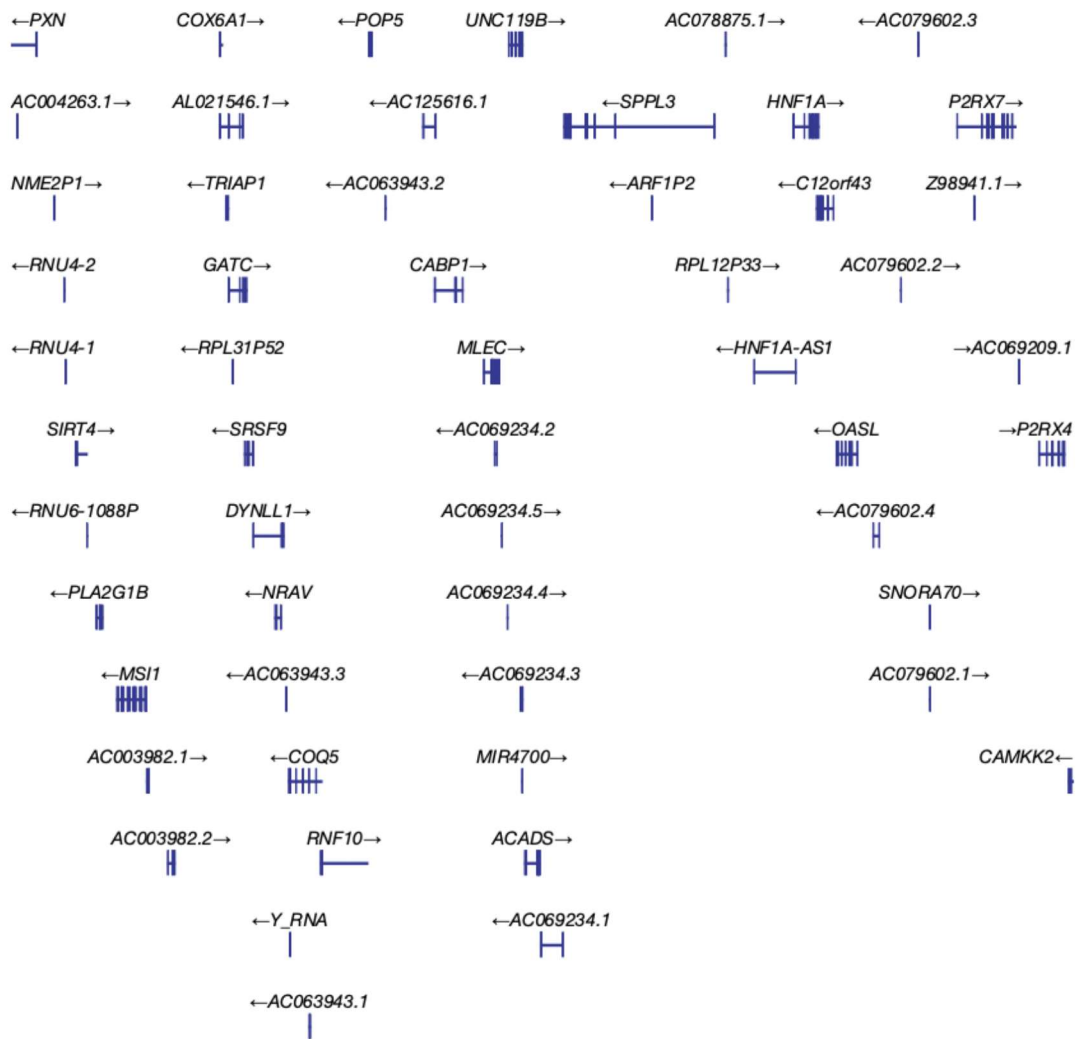

pp. Locus 23, rs114080902 and N-formylanthranilic acid.

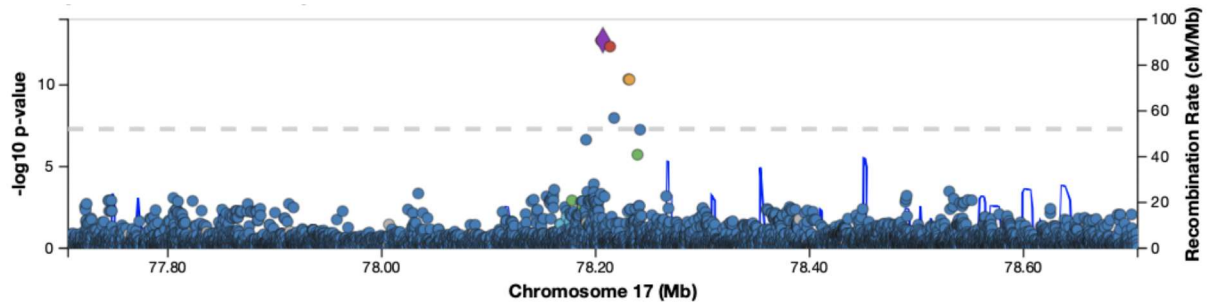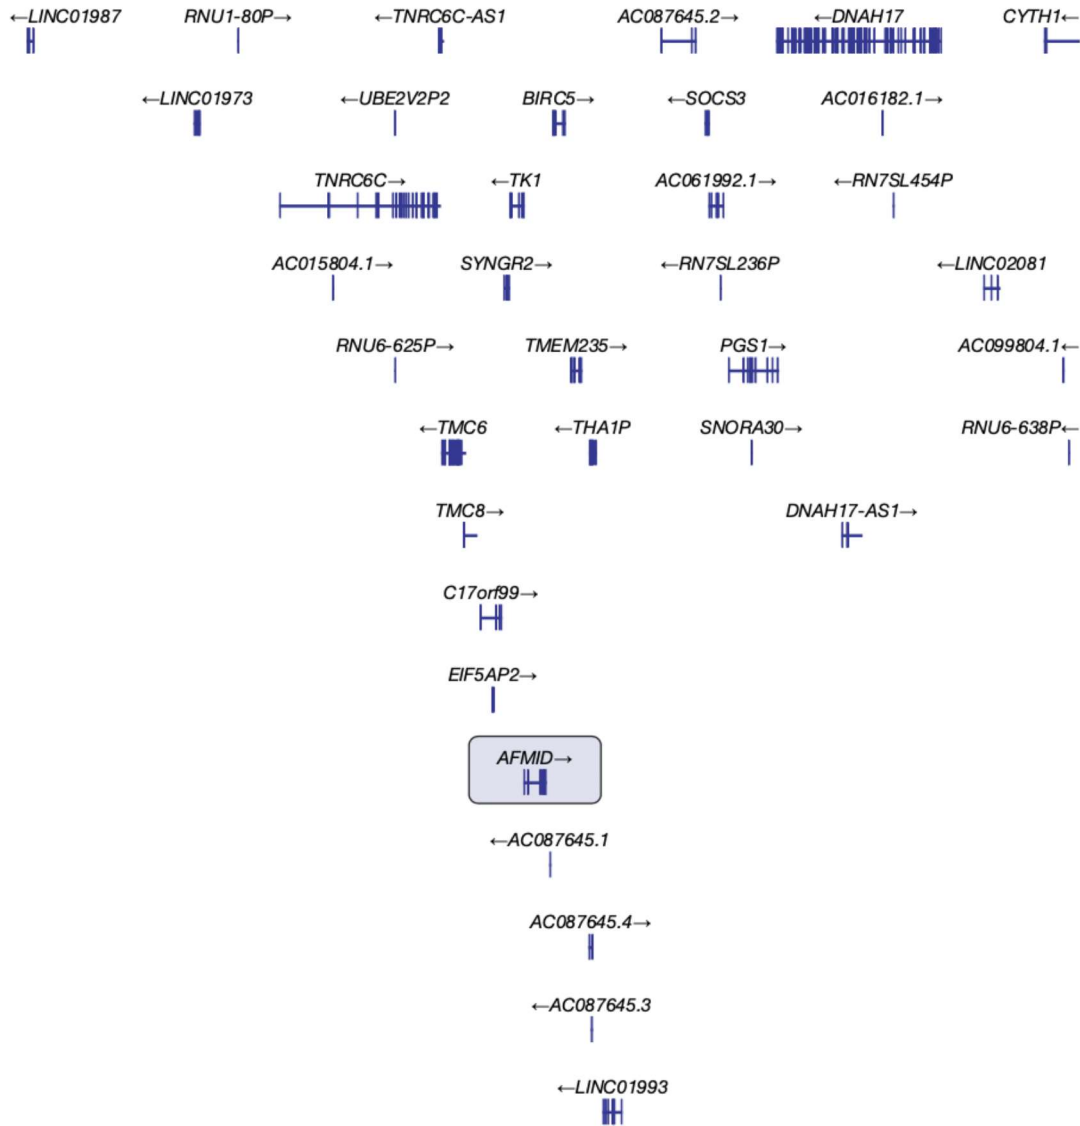

Color-coding indicates degree of linkage disequilibrium with index SNP: Purple indicates index SNP, red indicates SNPs with  $r^2 \geq 0.8$ , orange indicates SNPs with  $r^2 \geq 0.6$ , green indicates SNPs with  $r^2 \geq 0.4$ , light blue indicates SNPs with  $r^2 \geq 0.2$ , dark blue indicates SNPs with  $r^2 \geq 0$ , and grey indicates SNPs with unknown  $r^2$ .





Reference:

- S1. Yousri NA, Fakhro KA, Robay A, *et al.* Whole-exome sequencing identifies common and rare variant metabolic QTLs in a Middle Eastern population. *Nat Commun* 2018; **9**: 333.
- S2. Li Y, Sekula P, Wuttke M, *et al.* Genome-Wide Association Studies of Metabolites in Patients with CKD Identify Multiple Loci and Illuminate Tubular Transport Mechanisms. *Journal of the American Society of Nephrology : JASN* 2018; **29**: 1513-1524.
- S3. Long T, Hicks M, Yu HC, *et al.* Whole-genome sequencing identifies common-to-rare variants associated with human blood metabolites. *Nature genetics* 2017; **49**: 568-578.
- S4. Davis JP, Huyghe JR, Locke AE, *et al.* Common, low-frequency, and rare genetic variants associated with lipoprotein subclasses and triglyceride measures in Finnish men from the METSIM study. *PLoS genetics* 2017; **13**: e1007079-e1007079.
- S5. Rhee EP, Yang Q, Yu B, *et al.* An exome array study of the plasma metabolome. *Nature communications* 2016; **7**: 12360-12360.
- S6. Yu B, de Vries PS, Metcalf GA, *et al.* Whole genome sequence analysis of serum amino acid levels. *Genome Biol* 2016; **17**: 237.
- S7. Yu B, Li AH, Metcalf GA, *et al.* Loss-of-function variants influence the human serum metabolome. *Sci Adv* 2016; **2**: e1600800-e1600800.
- S8. Kettunen J, Demirkan A, Wurtz P, *et al.* Genome-wide study for circulating metabolites identifies 62 loci and reveals novel systemic effects of LPA. *Nat Commun* 2016; **7**: 11122.
- S9. Yet I, Menni C, Shin S-Y, *et al.* Genetic Influences on Metabolite Levels: A Comparison across Metabolomic Platforms. *PLoS One* 2016; **11**: e0153672-e0153672.
- S10. Burkhardt R, Kirsten H, Beutner F, *et al.* Integration of Genome-Wide SNP Data and Gene-Expression Profiles Reveals Six Novel Loci and Regulatory Mechanisms for Amino Acids and Acylcarnitines in Whole Blood. *PLoS genetics* 2015; **11**: e1005510-e1005510.
- S11. Kraus WE, Muoio DM, Stevens R, *et al.* Metabolomic Quantitative Trait Loci (mQTL) Mapping Implicates the Ubiquitin Proteasome System in Cardiovascular Disease Pathogenesis. *PLoS genetics* 2015; **11**: e1005553-e1005553.
- S12. Draisma HHM, Pool R, Kobl M, *et al.* Genome-wide association study identifies novel genetic variants contributing to variation in blood metabolite levels. *Nature communications* 2015; **6**: 7208-7208.
- S13. Demirkan A, Henneman P, Verhoeven A, *et al.* Insight in genome-wide association of metabolite quantitative traits by exome sequence analyses. *PLoS genetics* 2015; **11**: e1004835-e1004835.
- S14. Ried JS, Shin SY, Krumsiek J, *et al.* Novel genetic associations with serum level metabolites identified by phenotype set enrichment analyses. *Human molecular genetics* 2014; **23**: 5847-5857.

- S15. Yu B, Zheng Y, Alexander D, *et al.* Genetic determinants influencing human serum metabolome among African Americans. *PLoS genetics* 2014; **10**: e1004212.
- S16. Shin SY, Fauman EB, Petersen AK, *et al.* An atlas of genetic influences on human blood metabolites. *Nature genetics* 2014; **46**: 543-550.
- S17. Rhee EP, Ho JE, Chen MH, *et al.* A genome-wide association study of the human metabolome in a community-based cohort. *Cell metabolism* 2013; **18**: 130-143.
- S18. Hong M-G, Karlsson R, Magnusson PKE, *et al.* A genome-wide assessment of variability in human serum metabolism. *Hum Mutat* 2013; **34**: 515-524.
- S19. Kettunen J, Tukiainen T, Sarin AP, *et al.* Genome-wide association study identifies multiple loci influencing human serum metabolite levels. *Nature genetics* 2012; **44**: 269-276.
- S20. Tukiainen T, Kettunen J, Kangas AJ, *et al.* Detailed metabolic and genetic characterization reveals new associations for 30 known lipid loci. *Human molecular genetics* 2012; **21**: 1444-1455.
- S21. Krumsiek J, Suhre K, Evans AM, *et al.* Mining the unknown: a systems approach to metabolite identification combining genetic and metabolic information. *PLoS genetics* 2012; **8**: e1003005-e1003005.
- S22. Inouye M, Ripatti S, Kettunen J, *et al.* Novel Loci for metabolic networks and multi-tissue expression studies reveal genes for atherosclerosis. *PLoS genetics* 2012; **8**: e1002907-e1002907.
- S23. Demirkan A, van Duijn CM, Ugocsai P, *et al.* Genome-wide association study identifies novel loci associated with circulating phospho- and sphingolipid concentrations. *PLoS genetics* 2012; **8**: e1002490-e1002490.
- S24. Suhre K, Shin SY, Petersen AK, *et al.* Human metabolic individuality in biomedical and pharmaceutical research. *Nature* 2011; **477**: 54-60.
- S25. Mittelstrass K, Ried JS, Yu Z, *et al.* Discovery of sexual dimorphisms in metabolic and genetic biomarkers. *PLoS genetics* 2011; **7**: e1002215-e1002215.
- S26. Nicholson G, Rantalainen M, Li JV, *et al.* A genome-wide metabolic QTL analysis in Europeans implicates two loci shaped by recent positive selection. *PLoS genetics* 2011; **7**: e1002270-e1002270.
- S27. Illig T, Gieger C, Zhai G, *et al.* A genome-wide perspective of genetic variation in human metabolism. *Nature genetics* 2010; **42**: 137-141.
- S28. Gieger C, Geistlinger L, Altmaier E, *et al.* Genetics meets metabolomics: a genome-wide association study of metabolite profiles in human serum. *PLoS genetics* 2008; **4**: e1000282-e1000282.
